# Supplementary material for: Organometallic Ru(ii), Rh(iii) and Re(i) complexes of sterane-based bidentate ligands: synthesis, solution speciation, interaction with biomolecules and anticancer activity
Source: Royal Society of Chemistry journal article supplement (doi:10.1039/d3dt04138g), 2024-01-01
Supplement: d3dt04138g1.pdf [file d3dt04138g1.pdf]

SUPPLEMENTARY INFORMATION

**Organometallic Ru(II), Rh(III) and Re(I) complexes of sterane-based bidentate ligands: Synthesis, solution speciation, interaction with biomolecules and anticancer activity**

Tamás Pivarcsik, Márton A. Kiss, Uroš Rapuš, Jakob Kljun, Gabriella Spengler, Éva Frank, Iztok Turel, Éva A. Enyedy\*

**Characterization of the organometallic complexes**

Chemical shifts ( $\delta$ ) are reported in ppm.  $^1\text{H}$  NMR spectra are referenced to residual peaks of NMR solvent  $\text{CDCl}_3$  at 7.26 (referenced against the singlet line), and chemical shifts in  $^{13}\text{C}$  NMR spectra relative to NMR solvent  $\text{CDCl}_3$  at 77.16 (referenced against central line of triplet). The multiplicities are abbreviated as s = singlet, d = doublet, dd = doublet of the doublets dt = doublet of triplets and m = multiplet. Coupling constants (J) are given in Hz. MestReNova version 14.3 was used for NMR data processing.

**[RhCp\*(4-Me-bpy-St-OH)Cl]Cl (1)**

$^1\text{H}$  NMR ( $\text{CDCl}_3$ ,  $\delta$ /ppm, Figure S1.): 9.014 (d, J = 8.03 Hz, 0.46 H,  $\text{H}_{\text{lig}}(6'')$ ), 8.904 (d, J = 8.08 Hz, 0.54 H,  $\text{H}_{\text{lig}}(6'')$ ), 8.771 (s, 0.46 H,  $\text{H}_{\text{lig}}(5')$ ), 8.744 (s, 0.54 H,  $\text{H}_{\text{lig}}(5')$ ), 8.685 (d, J = 5.11 Hz, 0.45 H,  $\text{H}_{\text{lig}}(3''')$ ), 8.671 (d, J = 5.58 Hz, 0.55 H,  $\text{H}_{\text{lig}}(3''')$ ), 8.298 (td, J = 7.88 Hz; J = 1.36 Hz, 0.46 H,  $\text{H}_{\text{lig}}(4''')$ ), 8.269 (td, J = 8.02 Hz; J = 1.42 Hz, 0.54 H,  $\text{H}_{\text{lig}}(4''')$ ), 7.651 (dd, J = 6.16 Hz; J = 0.79 Hz, 0.45 H,  $\text{H}_{\text{lig}}(5''')$ ), 7.631 (dd, J = 6.48 Hz; J = 0.79 Hz, 0.55 H,  $\text{H}_{\text{lig}}(5''')$ ), 3.686 (m, 1H,  $\text{H}_{\text{lig}}(17)$ ), 3.701 (dd, J = 4.77 Hz, 0.50 H,  $\text{H}_{\text{lig}}(4)$ ), 3.110 (dd, J = 18.85 Hz; 13.25 Hz, 0.50 H,  $\text{H}_{\text{lig}}(4)$ ), 2.923 (dd, J = 18.89 Hz; 4.39 Hz, 0.50 H,  $\text{H}_{\text{lig}}(4)$ ), 2.524 (dd, J = 17.05 Hz; 12.56 Hz, 0.50 H,  $\text{H}_{\text{lig}}(4)$ ), 2.841 (dd, J = 17.31 Hz; 7.13 Hz, 1H,  $\text{H}_{\text{lig}}(1)$ ), 2.380 (d, J = 16.91 Hz; 0.50 H,  $\text{H}_{\text{lig}}(1)$ ), 2.272 (d, J = 17.57 Hz; 0.50 H,  $\text{H}_{\text{lig}}(1)$ ), 2.551 (d, J = 5.22 Hz; 3H,  $\text{H}_{\text{lig}}(1''''')$ ), 2.095 (m, 1H,  $\text{H}_{\text{lig}}(5)$ ), 1.913 (m, 1H), 1.844 – 1.625 (m-s, 6H), 1.584 (s, 7H,  $\text{HC}_5\text{Me}_5(\text{CH}_3)$ ), 1.557 (s, 8H,  $\text{HC}_5\text{Me}_5(\text{CH}_3)$ ), 1.519 – 1.254 (m-s, 10H), 1.160 (t, J = 11.94 Hz, 1H), 1.046 – 0.821 (m-s, 6H), 0.935; 0.803; 0.782; 0.741 (s-s, 6H,  $\text{H}_{\text{lig}}(18, 19)$ ).

$^{13}\text{C}$  NMR ( $\text{CDCl}_3$ ,  $\delta$ /ppm, Figure S2.): 158.77 (C(3)), 158.50 (C(3)), 156.59 (C(2'')), 156.29 (C(2'')), 152.49 (C(6'')), 152.40 (C(6'')), 151.99 (C(6'')), 151.97 (C(6'')), 151.91 (C(4')), 151.46 (C(4')), 141.23 (C(4'')), 141.14 (C(4'')), 136.52 (C(2)), 136.47 (C(2)), 127.19 (C(5')), 125.03 (C(5')), 124.87 (C(5'')), 124.26 (C(3'')), 124.19 (C(3'')), 97.00 (C(C<sub>5</sub>)), 96.94 (C(C<sub>5</sub>)), 81.70 (C(17)), 81.68 (C(17)), 53.75 (C(9)), 53.67 (C(9)), 50.88 (C(14)), 50.77 (C(14)), 42.86 (C(13)), 42.85 (C(13)), 42.31 (C(13)), 41.23 (C(5)), 41.01 (C(5)), 40.72 (C(5)), 39.37 (C(1)), 38.08 (C(1)), 36.59 (C(12)), 36.53 (C(12)), 35.49 (C(10)), 35.45 (C(10)), 35.37 (C(4)), 34.42 (C(8)), 31.04 (C(7)), 30.81 (C(7)), 30.44 (C(16)), 30.42 (C(16)), 27.98 (C(6)), 27.90 (C(6)), 23.38 (C(15)), 23.36 (C(15)), 20.99 (C(11)), 19.80 (C(1''''')), 19.76 (C(1''''')), 12.94 (C(18)), 12.68 (C(18)), 11.14 (C(19)), 11.12 (C(19)), 9.72 (C(Me<sub>5</sub>)), 9.37 (C(Me<sub>5</sub>)).

**ESI-HRMS** (positive): calc. for  $[\text{RhCp}^*(4\text{-Me-bpy-St-OH)Cl}]^+$  (C<sub>38</sub>H<sub>51</sub>ClN<sub>2</sub>ORh): 689.2745 (m/z) found: 689.2727 (m/z).

**Synthesis of [RhCp\*(4-Ph-bpy-St-OH)Cl]Cl (2)**

$^1\text{H}$  NMR ( $\text{CDCl}_3$ ,  $\delta$ /ppm, Figure S3.): 8.792 (dd, 1H,  $\text{H}_{\text{lig}}(3''')$ ), 8.404 (dd, 1H,  $\text{H}_{\text{lig}}(6''')$ ), 8.685 (d, J = 5.11 Hz, 1H,  $\text{H}_{\text{lig}}(4''')$ ), 8.055 (s, 0.56 H,  $\text{H}_{\text{lig}}(5''')$ ), 8.027 (s, 0.44 H,  $\text{H}_{\text{lig}}(5''')$ ), 7.743 (ddd, 1H,  $\text{H}_{\text{lig}}(5''')$ ), 7.555 (td, J = 7.80 Hz; J = 1.74 Hz, 2H,  $\text{H}_{\text{lig}}(3'''' & 5''''')$ ), 7.512 (m, 1H,  $\text{H}_{\text{lig}}(4''''')$ ), 7.400 (dd, J = 14.26 Hz; J = 7.10 Hz, 2H,  $\text{H}_{\text{lig}}(2'''' & 6''''')$ ), 3.856 (dd, J = 18.09; J = 5.44, 4.87 Hz, 0.46 H,  $\text{H}_{\text{lig}}(4)$ ), 3.640 (q, J = 19.33 Hz; J = 8.58 Hz, 1H,  $\text{H}_{\text{lig}}(17)$ ), 3.201 (d, J = 12.62 Hz, 0.20 H,  $\text{H}_{\text{lig}}(4)$ ), 3.168 (d, J = 13.02 Hz, 0.40 H,  $\text{H}_{\text{lig}}(4)$ ), 3.111 (d, J = 4.88 Hz, 0.38 H,  $\text{H}_{\text{lig}}(4)$ ), 3.079 (d, J = 4.97 Hz, 0.19 H,  $\text{H}_{\text{lig}}(4)$ ), 2.863 (d, J = 17.47 Hz, 0.50 H,  $\text{H}_{\text{lig}}(1)$ ), 2.792 (d, J = 17.11 Hz, 0.50 H,  $\text{H}_{\text{lig}}(1)$ ), 2.623 (dd, J = 17.75; J = 11.86 Hz, 0.50 H,  $\text{H}_{\text{lig}}(4)$ ), 2.537 (d, J = 16.94 Hz, 0.50 H,  $\text{H}_{\text{lig}}(1)$ ), 2.333 (d, J = 16.58 Hz, 0.50 H,  $\text{H}_{\text{lig}}(1)$ ), 2.077 (m, 1H,  $\text{H}_{\text{lig}}(5)$ ), 1.915 – 1.695 (m-s, 6H), 1.673 (s, 7H,  $\text{HC}_5\text{Me}_5(\text{CH}_3)$ ), 1.655 (s, 8H,  $\text{HC}_5\text{Me}_5(\text{CH}_3)$ ), 1.481 – 1.254 (m-s,

13H), 1.091 – 0.938 (m-s, 4H), 0.856 – 0.779 (m-s, 2H), 0.883; 0.736; 0.704; 0.654 (s-s, 6H, H<sub>lig</sub>(18, 19)).

**<sup>13</sup>C NMR** (CDCl<sub>3</sub>, δ/ppm, Figure S4.): 160.62 (C(3)), 160.54 (C(3)), 155.97 (C(2'')), 155.72 (C(2'')), 154.49 (C(6'')), 154.31 (C(6'')), 152.45 (C(4'')), 151.97 (C(4'')), 151.97 (C(6'')), 151.92 (C(6'')), 141.00 (C(1''')), 141.95 (C(1''')), 136.64 (C(4'')), 136.45 (C(4'')), 135.38 (C(2)), 135.19 (C(2)), 129.49 (C(4''')), 129.35 (C(4''')), 129.04 (C(3''' & 5''')), 128.48 (C(2''' & 6''')), 128.31 (C(2''' & 6''')), 127.69 (C(5''')), 127.65 (C(5''')), 123.93 (C(3''')), 123.71 (C(3''')), 122.78 (C(5'')), 122.38 (C(5'')), 97.52 (C(C<sub>5</sub>)), 97.49 (C(C<sub>5</sub>)), 97.47 (C(C<sub>5</sub>)), 97.44 (C(C<sub>5</sub>)), 81.71 (C(17)), 53.37 (C(9)), 53.35 (C(9)), 50.78 (C(14)), 50.72 (C(14)), 42.77 (C(13)), 42.36 (C(13)), 42.11 (C(5)), 42.04 (C(5)), 40.07 (C(1)), 38.85 (C(1)), 36.46 (C(12)), 36.43 (C(12)), 35.78 (C(10)), 35.47 (C(4)), 35.36 (C(4)), 34.63 (C(8)), 30.96 (C(7)), 30.81 (C(7)), 30.46 (C(16)), 28.00 (C(6)), 23.36 (C(15)), 23.34 (C(15)), 20.83 (C(11)), 12.43 (C(18)), 12.15 (C(18)), 11.05 (C(19)), 11.03 (C(19)), 10.00 (C(Me<sub>5</sub>)), 9.63 (C(Me<sub>5</sub>)).

**ESI-HRMS** (positive): calc. for [RhCp\*(4-Ph-bpy-St-OH)Cl]<sup>+</sup> (C<sub>43</sub>H<sub>53</sub>ClN<sub>2</sub>ORh): 751.2901 (m/z) found: 751.2883 (m/z).

### Synthesis of [RuCym(4-Me-bpy-St-OH)Cl]Cl (3)

**<sup>1</sup>H NMR** (CDCl<sub>3</sub>, δ/ppm, Figure S5.): 9.682 (m, 0.38 H, H<sub>lig</sub>(3'')), 9.544 (m, 0.62 H, H<sub>lig</sub>(3'')), 8.232 (dd, J = 8.11 Hz, 0.38 H, H<sub>lig</sub>(6'')), 8.214 (dd, J = 8.35 Hz, 0.62 H, H<sub>lig</sub>(6'')), 8.043 (m, 1H, H<sub>lig</sub>(4'')), 8.019 (s, 0.38 H, H<sub>lig</sub>(5'')), 7.992 (s, 0.62 H, H<sub>lig</sub>(5'')), 7.777 (m, 0.38 H, H<sub>lig</sub>(5'')), 7.730 (m, 0.62 H, H<sub>lig</sub>(5'')), 6.274 (m, 0.38 H, H<sub>Cym</sub>(C3)), 6.100 (m, 0.62 H, H<sub>Cym</sub>(C3)), 6.035 (m, 1H, H<sub>Cym</sub>(C3)), 5.941 (d, 0.62 H, H<sub>Cym</sub>(C2)), 5.851 (d, 0.38 H, H<sub>Cym</sub>(C2)), 5.686 (d, 0.62 H, H<sub>Cym</sub>(C2)), 5.638 (d, 0.38 H, H<sub>Cym</sub>(C2)), 3.712 (dd, J = 4.48 Hz, 0.38 H, H<sub>lig</sub>(4)), 3.692 (m, 1H, H<sub>lig</sub>(17)), 3.346 (dd, J = 18.38; 5.23 Hz, 0.62 H, H<sub>lig</sub>(4)), 3.190 (dd, J = 18.27; 12.73 Hz, 0.62 H, H<sub>lig</sub>(4)), 2.821 (dd, Under the peak H<sub>lig</sub>(1), 0.38 H, H<sub>lig</sub>(4)), 2.836 (d, J = 17.63 Hz, 0.38 H, H<sub>lig</sub>(1)), 2.792 (d, J = 16.96 Hz, 0.62 H, H<sub>lig</sub>(1)), 2.601 – 2.501 (m, 1H, H<sub>Cym</sub>(C5)), 2.466 (s, 1H, H<sub>Cym</sub>(C8)), 2.461 (s, 2H, H<sub>Cym</sub>(C8)), 2.417 (d, J = 16.84 Hz, 0.62 H, H<sub>lig</sub>(1)), 2.303 (d, J = 11.81 Hz, 0.62 H, H<sub>lig</sub>(1)), 2.280 (s, 1H, H<sub>lig</sub>(1''')), 2.232 (s, 2H, H<sub>lig</sub>(1''')), 2.104 (m, 1H, H<sub>lig</sub>(5)), 1.956 – 1.878 (m, 2H), 1.860 – 1.781 (m, 2H), 1.759 – 1.682 (m, 3H), 1.539 – 1.141 (m, Sterane protons), 1.061 – 1.003 (d-s, 6H, H<sub>Cym</sub>(C6 & C7)), 0.884 (s, 1H, H<sub>lig</sub>(18)), 0.819 (s, 1H, H<sub>lig</sub>(19)), 0.780 (s, 2H, H<sub>lig</sub>(18)), 0.681 (s, 2H, H<sub>lig</sub>(19)).

**<sup>13</sup>C NMR** (CDCl<sub>3</sub>, δ/ppm, Figure S6.): 160.40 (C(3)), 160.06 (C(3)), 157.13 (C(2'')), 156.65 (C(2'')), 155.55 (C(6'')), 154.94 (C(6'')), 152.57 (C(6'')), 152.40 (C(6'')), 151.09 (C(4'')), 150.82 (C(4'')), 139.71 (C(4'')), 139.63 (C(4'')), 136.05 (C(2)), 135.76 (C(2)), 128.22 (C(5'')), 127.83 (C(5'')), 123.08 (C(5'')), 122.96 (C(3''')), 122.86 (C(3''')), 105.75 (C(4)), 104.12 (C(C1)), 88.65 (C(C3 & C2)), 85.85 (C(C3 & C2)), 84.08 (C(C3 & C2)), 83.64 (C(C3 & C2)), 81.78 (C(17)), 81.72 (C(17)), 53.91 (C(9)), 53.62 (C(9)), 50.87 (C(14)), 50.81 (C(14)), 42.90 (C(13)), 42.88 (C(13)), 42.18 (C(13)), 41.37 (C(1)), 41.32 (C(1)), 41.13 (C(1)), 40.06 (C(5)), 40.02 (C(5)), 36.64 (C(12)), 36.58 (C(12)), 35.47 (C(10)), 34.76 (C(4)), 34.20 (C(8)), 31.13 (C(7)), 31.05 (C(7)), 30.95 (C(5)), 30.82 (C(5)), 30.51 (C(16)), 30.46 (C(16)), 28.41 (C(6)), 28.26 (C(6)), 23.38 (C(15)), 22.50 (C(C6 & C7)), 22.31 (C(C6 & C7)), 22.11 (C(C6 & C7)), 21.79 (C(C6 & C7)), 21.05 (C(11)), 21.01 (C(11)), 19.90 (C(1''')), 19.80 (C(1''')), 19.12 (C(C8)), 18.90 (C(C8)), 12.79 (C(18)), 12.31 (C(18)), 11.19 (C(19)), 11.15 (C(19)).

**ESI-HRMS** (positive): calc. for [RuCym(4-Me-bpy-St-OH)Cl]<sup>+</sup> (C<sub>38</sub>H<sub>50</sub>ClN<sub>2</sub>ORu): 687.2655 (m/z) found: 687.2641 (m/z).

### Synthesis of [RuCym(4-Ph-bpy-St-OH)Cl]Cl (4)

**<sup>1</sup>H NMR** (CDCl<sub>3</sub>, δ/ppm, Figure S7.): 9.860 (m, 0.33 H, H<sub>lig</sub>(3'')), 9.716 (m, 0.67 H, H<sub>lig</sub>(3'')), 8.020 (dd, 0.33 H, H<sub>lig</sub>(6'')), 8.014 (dd, 0.67 H, H<sub>lig</sub>(6'')), 8.014 (t, Under the peak H<sub>lig</sub>(6''), 0.67 H, H<sub>lig</sub>(4'')), 7.975 (t, J = 7.91; 9.38 Hz, 0.33 H, H<sub>lig</sub>(4'')), 7.858 (m, 0.33 H, H<sub>lig</sub>(5'')), 7.806 (m, 0.67 H, H<sub>lig</sub>(5'')), 7.788 (s, 0.67 H, H<sub>lig</sub>(5'')), 7.747 (s, 0.33 H, H<sub>lig</sub>(5'')), 7.556 – 7.505 (m, 3H, H<sub>lig</sub>(3''' – 5''')), 7.343 (d, J = 6.53 Hz, 2H, H<sub>lig</sub>(2''' & 6''')), 7.290 (d, J = 6.53 Hz, 1H, H<sub>lig</sub>(2''' & 6''')), 6.449 (m, 0.38 H, H<sub>Cym</sub>(C3)), 6.228 (m, 1H, H<sub>Cym</sub>(C3)), 6.214 (m, 0.67 H, H<sub>Cym</sub>(C3)), 6.134 (d, J = 4.97 Hz, 0.67 H, H<sub>Cym</sub>(C2)), 5.962 (d, J = 5.63 Hz, 0.33 H, H<sub>Cym</sub>(C2)), 5.823 (d, J = 5.18 Hz, 0.67 H, H<sub>Cym</sub>(C2)), 5.771 (d, J = 3.91 Hz, 0.33 H, H<sub>Cym</sub>(C2)), 3.854 (dd, J = 17.42, 4.74 Hz, 0.33 H, H<sub>lig</sub>(4)), 3.636 (m, J = 14.03 Hz, 8.07 Hz, 7.74 Hz, 1H, H<sub>lig</sub>(17)), 3.538 (dd, J = 18.50, 5.83, 6.00 Hz, 0.67 H, H<sub>lig</sub>(4)), 3.292 (dd, J = 18.66, 11.67 Hz, 12.04, 0.67 H, H<sub>lig</sub>(4)), 2.904 (dd, J = 17.34, 12.15 Hz, 12.47, 0.33 H, H<sub>lig</sub>(4)), 2.838 (d, J = 17.58 Hz, 0.33 H, H<sub>lig</sub>(1)), 2.702 (d, J = 16.73 Hz, 0.67 H, H<sub>lig</sub>(1)), 2.626 (m, 1H, H<sub>Cym</sub>(C5)), 2.562 (d, J = 16.74 Hz, 0.67 H, H<sub>lig</sub>(1)),

2.315 (s, 1H, H<sub>Cym</sub>(C8)), 2.295 (d, Under the peak H<sub>Cym</sub>(C8), 0.33 H, H<sub>lig</sub>(1)), 2.270 (s, 2H, H<sub>Cym</sub>(C8)), 2.068 (m, 1H, H<sub>lig</sub>(5)), 2.060 – 2.020 & 1.829 – 1.729 (m, 4H), 1.464 – 1.229 (m, 10H), 1.089 – 1.050 (d-s, 6H, H<sub>Cym</sub>(C6 & C7)), 0.959 (s, 1H, H<sub>lig</sub>(18)), 0.750 (s, 1H, H<sub>lig</sub>(19)), 0.695 (s, 2H, H<sub>lig</sub>(18)), 0.564 (s, 2H, H<sub>lig</sub>(19)).

<sup>13</sup>C NMR (CDCl<sub>3</sub>, δ/ppm, Figure S8.): 162.61 (C(3)), 161.58 (C(3)), 157.97 (C(2'')), 157.29 (C(2'')), 155.20 (C(6')), 154.49 (C(6')), 153.66 (C(4')), 153.68 (C(4')), 152.80 (C(6'')), 152.49 (C(6'')), 139.39 (C(1''')), 139.32 (C(1''')), 136.84 (C(4'')), 136.74 (C(4'')), 134.97 (C(2)), 134.52 (C(2)), 129.43 (C(4''')), 129.31 (C(4''')), 129.06 (C(3''' & 5''')), 129.02 (C(3''' & 5''')), 128.76 (C(5'')), 128.23 (C(5'')), 128.39 (C(2''' & 6''')), 128.08 (C(2''' & 6''')), 122.26 (C(3''')), 122.16 (C(3''')), 121.61 (C(5'')), 121.46 (C(5')), 106.33 (C(C4)), 104.09 (C(C1)), 88.84 (C(C3 & C2)), 86.60 (C(C3 & C2)), 84.07 (C(C3 & C2)), 83.80 (C(C3 & C2)), 81.78 (C(17)), 81.71 (C(17)), 53.52 (C(9)), 53.23 (C(9)), 50.78 (C(14)), 50.73 (C(14)), 42.82 (C(13)), 42.79 (C(13)), 42.64 (C(13)), 42.44 (C(1)), 42.34 (C(1)), 41.49 (C(1)), 40.70 (C(5)), 40.66 (C(5)), 36.52 (C(12)), 36.46 (C(12)), 35.47 (C(10)), 35.45 (C(10)), 35.01 (C(4)), 34.37 (C(8)), 31.24 (C(7)), 31.14 (C(7)), 30.89 (C(C5)), 30.81 (C(C5)), 30.51 (C(16)), 30.46 (C(16)), 28.45 (C(6)), 28.33 (C(6)), 23.36 (C(15)), 22.55 (C(C6 & C7)), 22.29 (C(C6 & C7)), 22.18 (C(C6 & C7)), 21.85 (C(C6 & C7)), 20.87 (C(11)), 20.80 (C(11)), 19.16 (C(C8)), 18.95 (C(C8)), 12.36 (C(18)), 11.86 (C(18)), 11.09 (C(19)), 11.05 (C(19)).

**ESI-HRMS** (positive): calc. for [RuCym(4-Ph-bpy-St-OH)Cl]<sup>+</sup> (C<sub>43</sub>H<sub>52</sub>ClN<sub>2</sub>ORu): 749.2812 (m/z) found: 749.2798 (m/z).

### Synthesis of [Re(CO)<sub>3</sub>(4-Me-bpy-St-OH)Cl]Cl (5)

<sup>1</sup>H NMR (CDCl<sub>3</sub>, δ/ppm, Figure S9.): 9.092 (td, J = 4.92 Hz; J = 0.83 Hz, 1H, H(3'')), 8.114 (t, J = 7.93 Hz; 1H, H(6'')), 7.998 (td, J = 7.89 Hz; J = 1.55, 1.44 Hz, 1H, H(4'')), 7.802 (d, J = 7.30 Hz; 1H, H(5'')), 7.468 (m, J = 1.16 Hz, 1H, H(5'')), 3.676 (m, 1H, H(17)), 3.523 (dd, J = 17.85; 5.36 Hz, 0.50 H, H(4)), 3.260 (dd, J = 17.83; 5.16 Hz, 0.50 H, H(4)), 3.128 (dd, J = 17.85; 12.26 Hz, 0.50 H, H(4)), 2.930 (dd, J = 17.84; 12.29 Hz, 0.50 H, H(4)), 2.773 (dd, J = 17.13; 5.94 Hz, 1H, H(1)), 2.409 (s, 3H, H(1''')), 2.314 (dd, J = 16.00, 1H, H(1)), 2.098 (m, 1H, H(5)), 1.902 (dq, 1H), 1.811 (m, 2H), 1.727 – 1.626 (m, 3H), 1.527 – 1.428 (m-s, 4H), 1.352 – 1.282 (m-s, 2H), 1.190 – 1.129 (m-s, 1H), 1.051 – 0.858 (m-s, 4H), 0.843 (d, J = 4.34, 3H, H(18)), 0.796 (d, J = 1.64, 3H, H(19)).

<sup>13</sup>C NMR (CDCl<sub>3</sub>, δ/ppm, Figure S10.): 197.47, 197.40, 197.09 (C(C1 – C3)), 159.46 (C(3)), 159.21 (C(3)), 157.40 (C(2'')), 157.21 (C(2'')), 152.95 (C(6')), 152.83 (C(6')), 152.71 (C(6'')), 152.67 (C(6'')), 150.06 (C(4')), 150.05 (C(4')), 138.69 (C(4'')), 135.25 (C(2)), 135.17 (C(2)), 126.32 (C(5')), 126.07 (C(5')), 122.72 (C(5'')), 122.59 (C(5'')), 122.27 (C(3''')), 122.14 (C(3''')), 81.93 (C(17)), 81.89 (C(17)), 53.97 (C(9)), 53.85 (C(9)), 50.93 (C(14)), 50.86 (C(14)), 42.98, 42.88, 42.49, 42.43, 42.12, 41.44 (C(13 & 5 & 1)), 36.70 (C(12)), 36.67 (C(10)), 35.52 (C(4)), 35.45 (C(4)), 34.23 (C(8)), 34.11 (C(8)), 30.97 (C(7)), 30.94 (C(7)), 30.89 (C(7)), 30.61 (C(16)), 30.59 (C(16)), 27.80 (C(6)), 27.72 (C(6)), 23.38 (C(15)), 21.07 (C(11)), 20.07 (C(1''')), 20.01 (C(1''')), 12.34 (C(18)), 12.22 (C(18)), 11.14 (C(19)), 11.12 (C(19)).

**ESI-HRMS** (positive): calc. for [Re(CO)<sub>3</sub>(4-Me-bpy-St-OH)CH<sub>3</sub>CN] (C<sub>33</sub>H<sub>42</sub>N<sub>3</sub>O<sub>4</sub>Re): 728.2498 (m/z) found: 728.2488 (m/z).

### Synthesis of [Re(CO)<sub>3</sub>(4-Ph-bpy-St-OH)Cl]Cl (6)

<sup>1</sup>H NMR (CDCl<sub>3</sub>, δ/ppm, Figure S11.): 9.125 (dq, J = 5.53 Hz, 0.90 H, H(3'')), 9.102 (d, J = 5.08 Hz, 0.05 H, H(3'')), 9.078 (d, J = 4.89 Hz, 0.05 H, H(3'')), 8.179 (t, J = 7.83 Hz, 0.10 H, H(6'')), 8.102 (t, J = 8.46 Hz, 0.90 H, H(6'')), 8.102 (Under the peak H(6''), 0.10 H, H(4'')), 7.987 (td, J = 7.74 Hz; J = 1.40 Hz, 0.90 H, H(4'')), 7.917 (s, 0.06 H, H(5')), 7.888 (s, 0.04 H, H(5')), 7.840 (d, J = 9.94 Hz, 0.90 H, H(5')), 7.626 – 7.563 (0.20 H, H(5'', 3''', 4''', 5''')), 7.557 – 7.470 (4H, H(5'', 3''', 4''', 5''')), 7.376 – 7.353 (0.20 H, H(2''' & 6''')), 7.339 (dt, J = 6.61 Hz, 0.95 H, H(2''' & 6''')) and 7.312 (dt, J = 6.53 Hz, 0.85 H, H(2''' & 6''')), 3.665 (dd, J = 18.82; 5.75 Hz, 0.50 H, H(4)), 3.624 (m, 1H, H(17)), 3.433 (dd, J = 17.32; 5.43 Hz, 0.50 H, H(4)), 3.159 (dd, J = 18.00; 12.17 Hz, 0.50 H, H(4)), 2.969 (dd, J = 18.02; 11.78 Hz, 0.50 H, H(4)), 2.751 (dd, J = 17.08; 8.25 Hz, 1H, H(1)), 2.374 (d, J = 22.25; 17.22 Hz, 1H, H(1)), 2.072 (m, 1H, H(5)), 1.852 – 1.601 (m-s, 6H), 1.491 – 1.254 (m-s, 10H), 1.067 – 0.779 (m-s, 6H), 0.755 (d, J = 6.03 Hz, 3H, H(18)), 0.722 (d, J = 3.00 Hz, 3H, H(19)).

<sup>13</sup>C NMR (CDCl<sub>3</sub>, δ/ppm, Figure S12.): 197.40, 197.33, 196.98 (C(C1 – C3)), 160.82 (C(3)), 160.61 (C(3)), 157.30 (C(2'')), 157.13 (C(2'')), 153.26 (C(6')), 153.21 (C(6')), 153.19 (C(4')), 153.15 (C(4')), 152.77 (C(6'')), 152.74 (C(6'')), 138.77 (C(1''')), 138.74 (C(1''')), 137.54 (C(4'')), 137.51 (C(4'')), 134.14 (C(2)), 133.95 (C(2)), 129.11, 128.99, 128.97, 128.16, 128.08 (C(2''' – 6''')), 126.51 (C(5'')), 126.30

(C(5'')), 122.88 (C(3'')), 122.76 (C(3'')), 121.98 (C(5')), 121.80 (C(5')), 81.92 (C(17)), 81.87 (C(17)), 53.60 (C(9)), 53.46 (C(9)), 50.86 (C(14)), 50.78 (C(14)), 43.58 (C(5)), 43.13 (C(5)), 42.80 (C(13)), 42.77 (C(1)), 42.66 (C(1)), 42.55 (C(1)), 42.43 (C(1)), 36.58 (C(12)), 36.54 (C(12)), 35.52 (C(4)), 35.45 (C(4)), 35.42 (C(8)), 35.33 (C(8)), 30.95 (C(7)), 30.87 (C(7)), 30.60 (C(16)), 30.57 (C(16)), 27.85 (C(6)), 27.82 (C(6)), 23.36 (C(15)), 20.87 (C(11)), 20.86 (C(11)), 11.86 (C(18)), 11.80 (C(18)), 11.06 (C(19)), 11.03 (C(19)).

**ESI-HRMS** (positive): calc. for [Re(CO)<sub>3</sub>(4-Ph-bpy-St-OH)CH<sub>3</sub>CN] (C<sub>38</sub>H<sub>44</sub>N<sub>3</sub>O<sub>4</sub>Re): 790.2655 (m/z) found: 790.2636 (m/z).

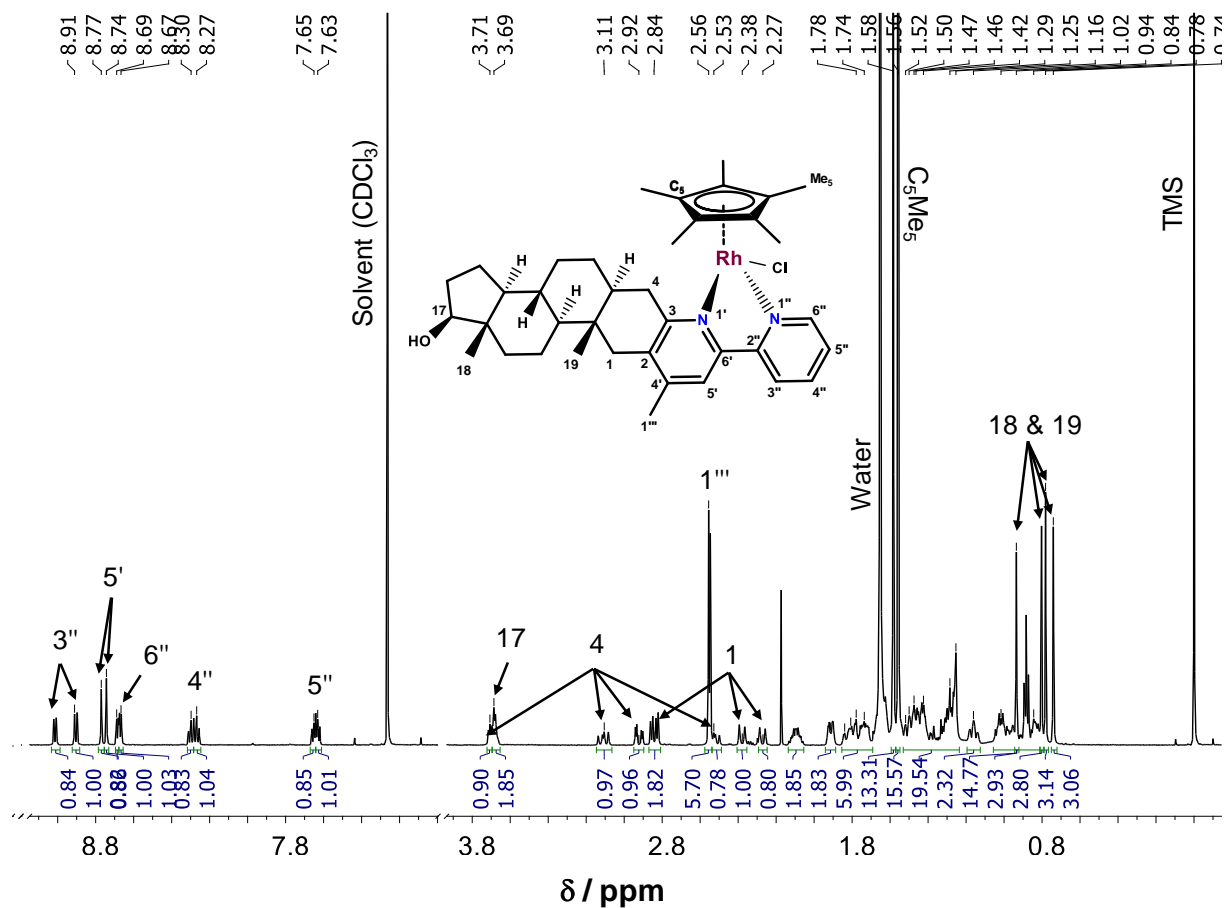

**Figure S1.** <sup>1</sup>H NMR spectrum of [RhCp\*(4-Me-bpy-St-OH)Cl]Cl (**1**) in CDCl<sub>3</sub>. Inserted structure shows the numbering of peaks.



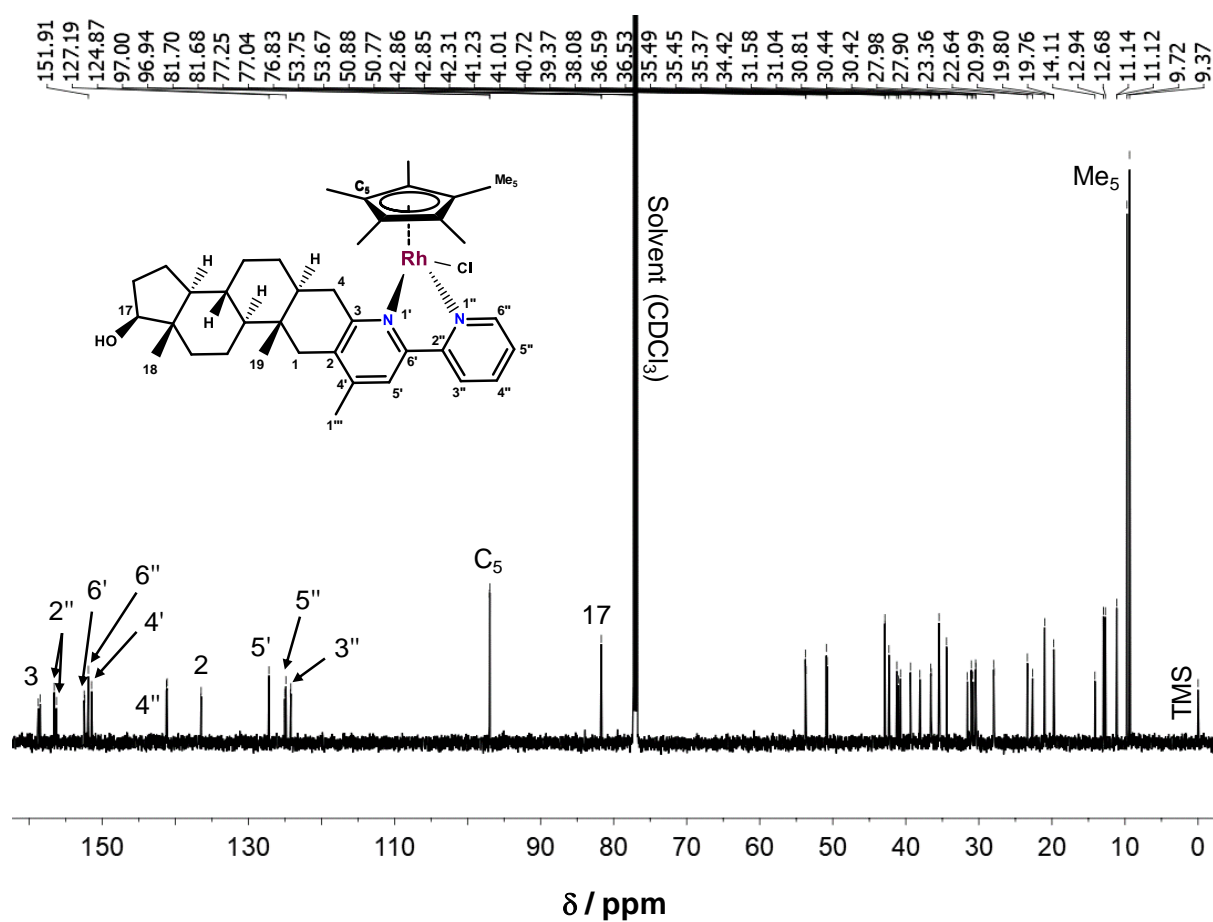

**Figure S2.**  $^{13}\text{C}$  NMR spectrum of  $[\text{RhCp}^*(4\text{-Me-bpy-St-OH})\text{Cl}]\text{Cl}$  (**1**) in  $\text{CDCl}_3$ . Inserted structure shows the numbering of peaks.

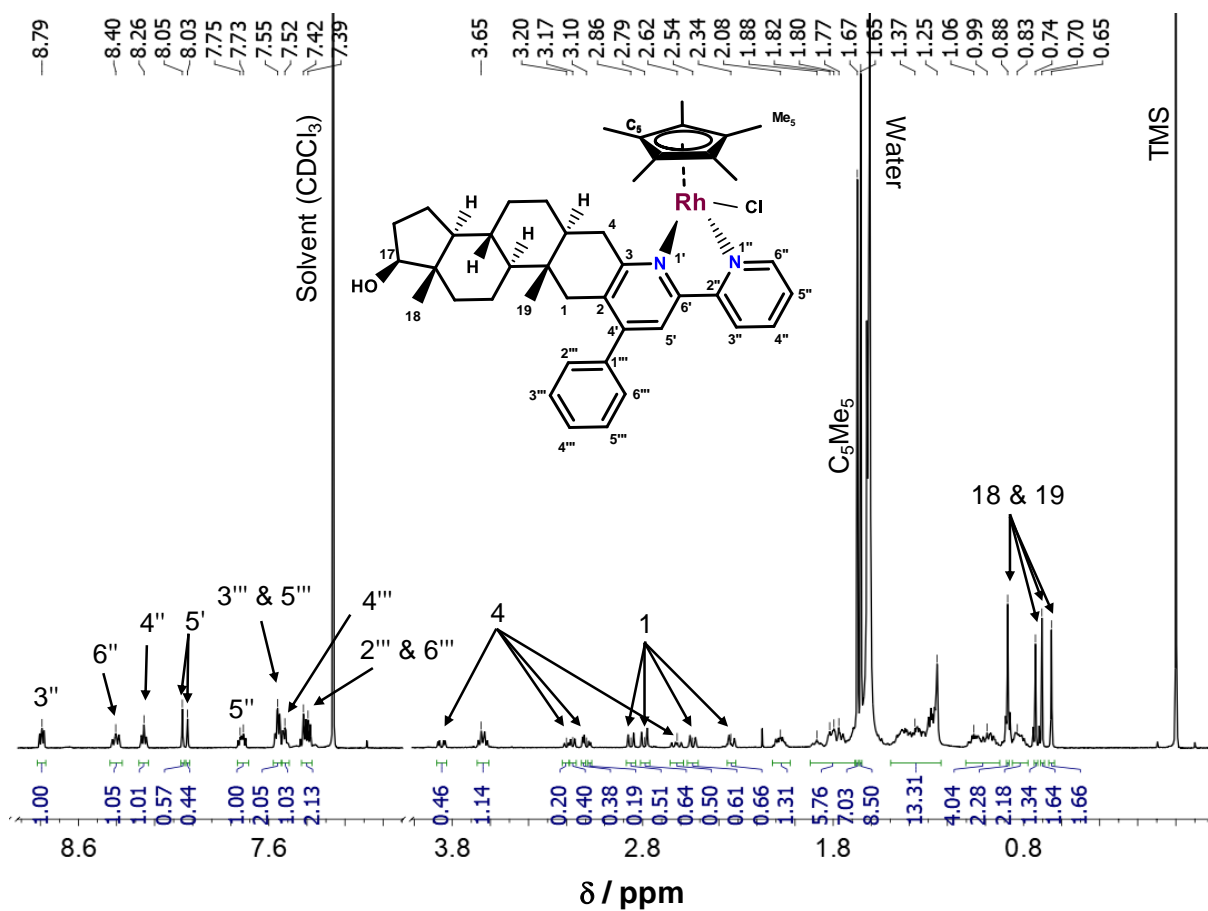

**Figure S3.**  $^1\text{H}$  NMR spectrum of  $[\text{RhCp}^*(4\text{-Ph-bpy-St-OH})\text{Cl}]\text{Cl}$  (**2**) in  $\text{CDCl}_3$ . Inserted structure shows the numbering of peaks.

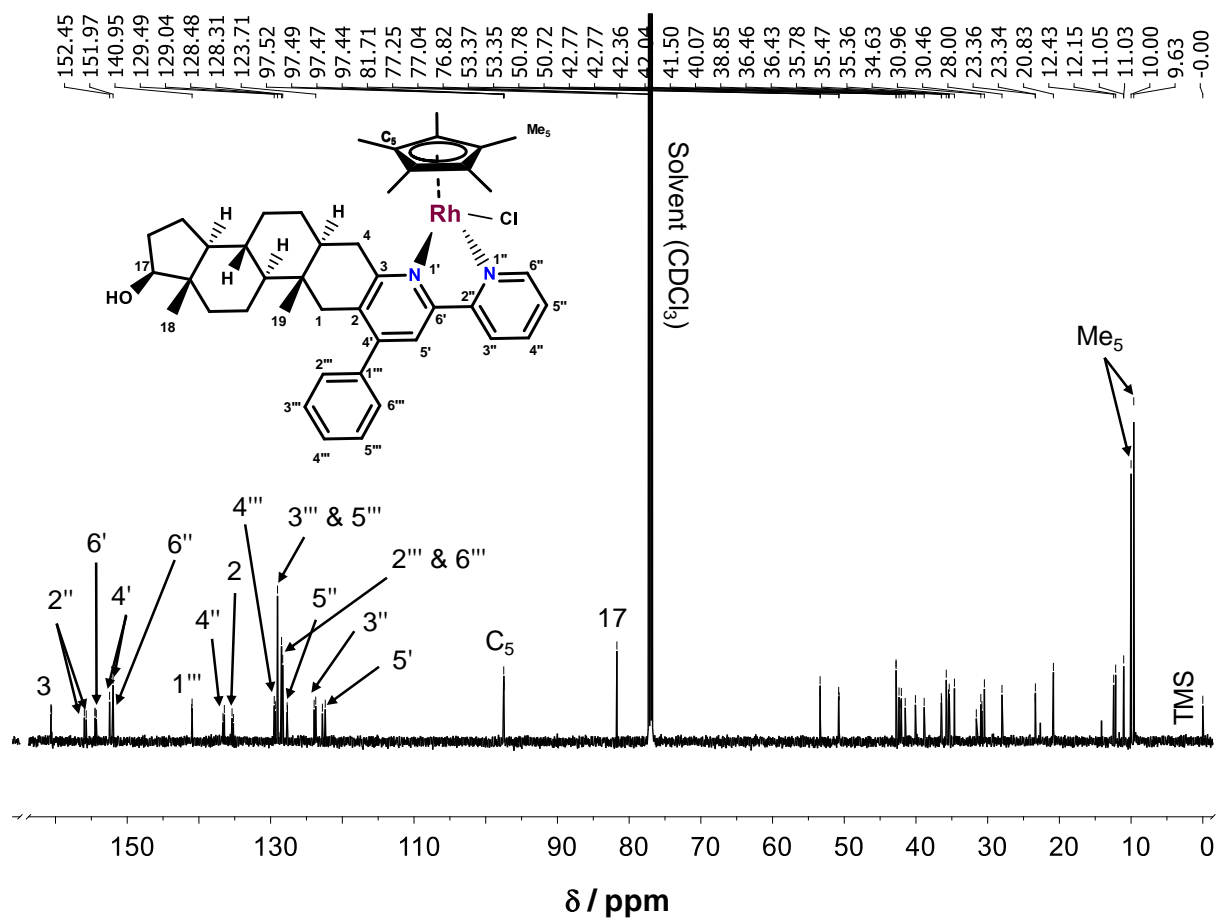

**Figure S4.**  $^{13}\text{C}$  NMR spectrum of  $[\text{RhCp}^*(4\text{-Ph-bpy-St-OH})\text{Cl}]\text{Cl}$  (**2**) in  $\text{CDCl}_3$ . Inserted structure shows the numbering of peaks.

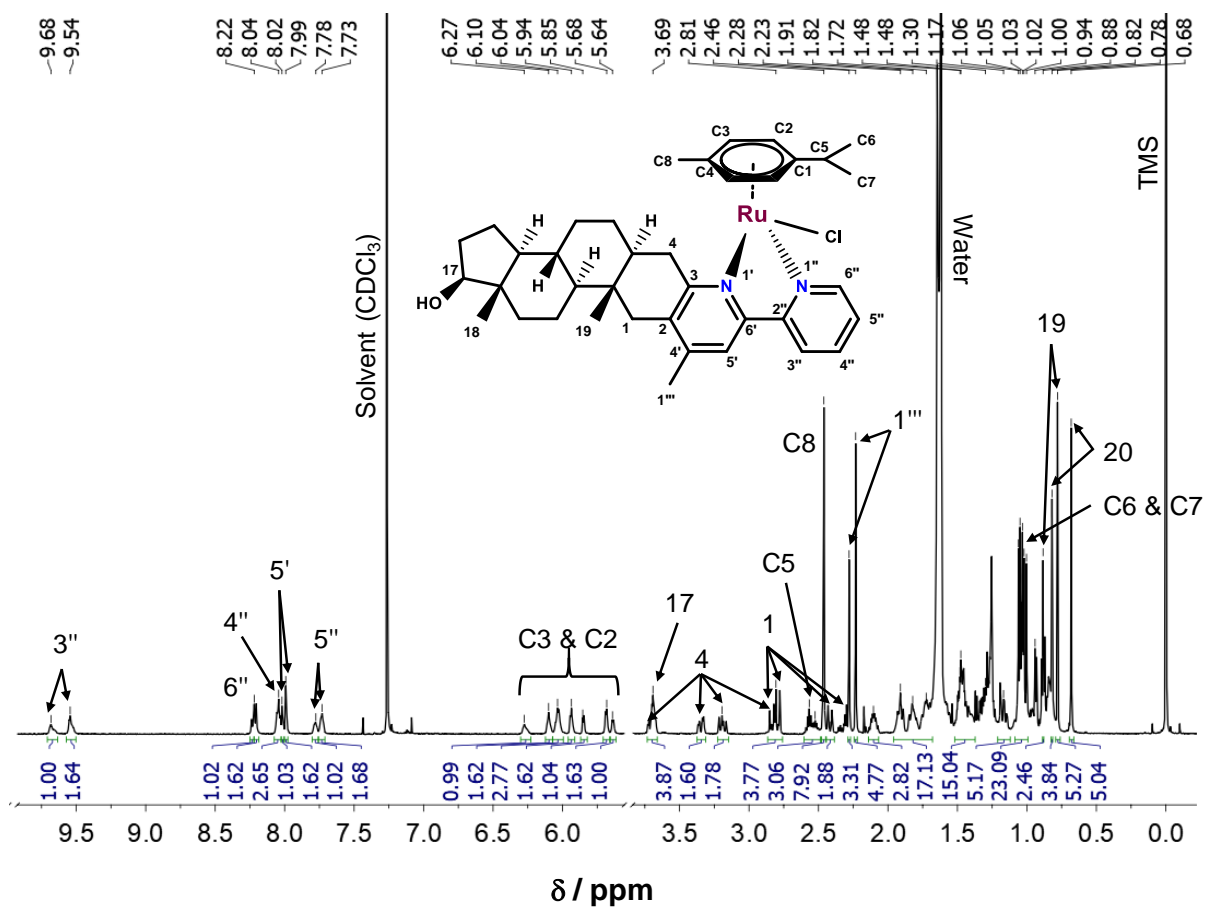

**Figure S5.**  $^1\text{H}$  NMR spectrum of  $[\text{RuCym}(4\text{-Me-bpy-St-OH})\text{Cl}]\text{Cl}$  (**3**) in  $\text{CDCl}_3$ . Inserted structure shows the numbering of peaks.

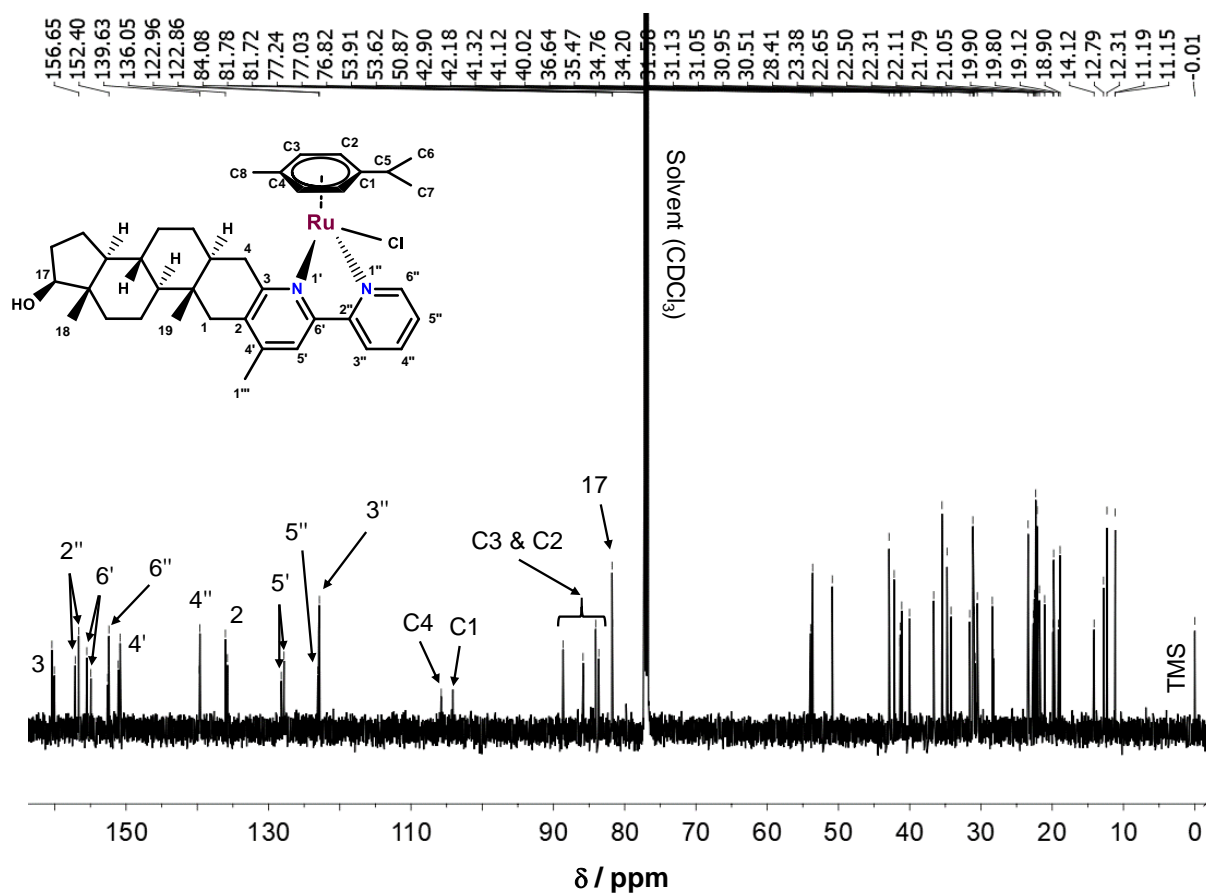

**Figure S6.**  $^{13}\text{C}$  NMR spectrum of  $[\text{RuCym}(4\text{-Me-bpy-St-OH})\text{Cl}]\text{Cl}$  (**3**) in  $\text{CDCl}_3$ . Inserted structure shows the numbering of peaks.

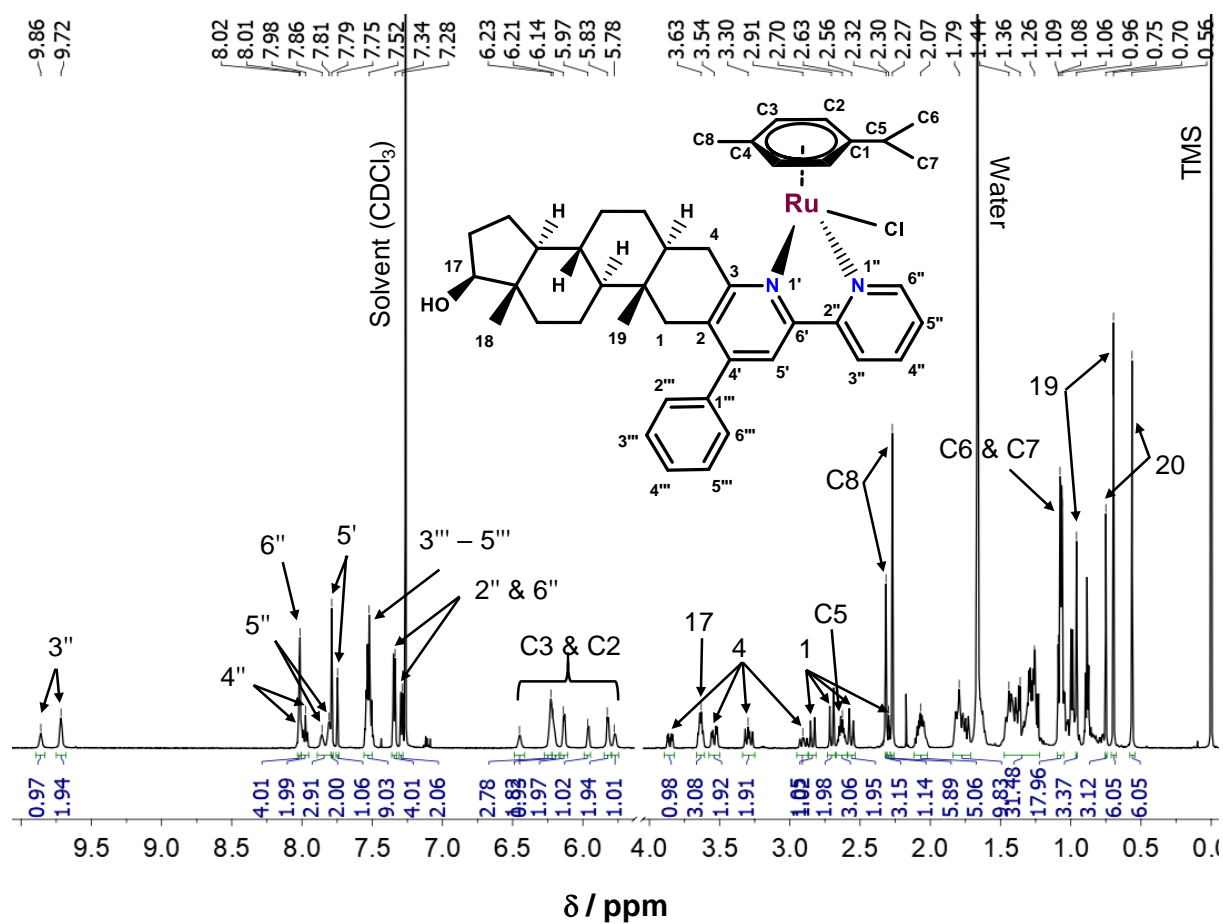

**Figure S7.** <sup>1</sup>H NMR spectrum of [RuCym(4-Ph-bpy-St-OH)Cl]Cl (**4**) in CDCl<sub>3</sub>. Inserted structure shows the numbering of peaks.



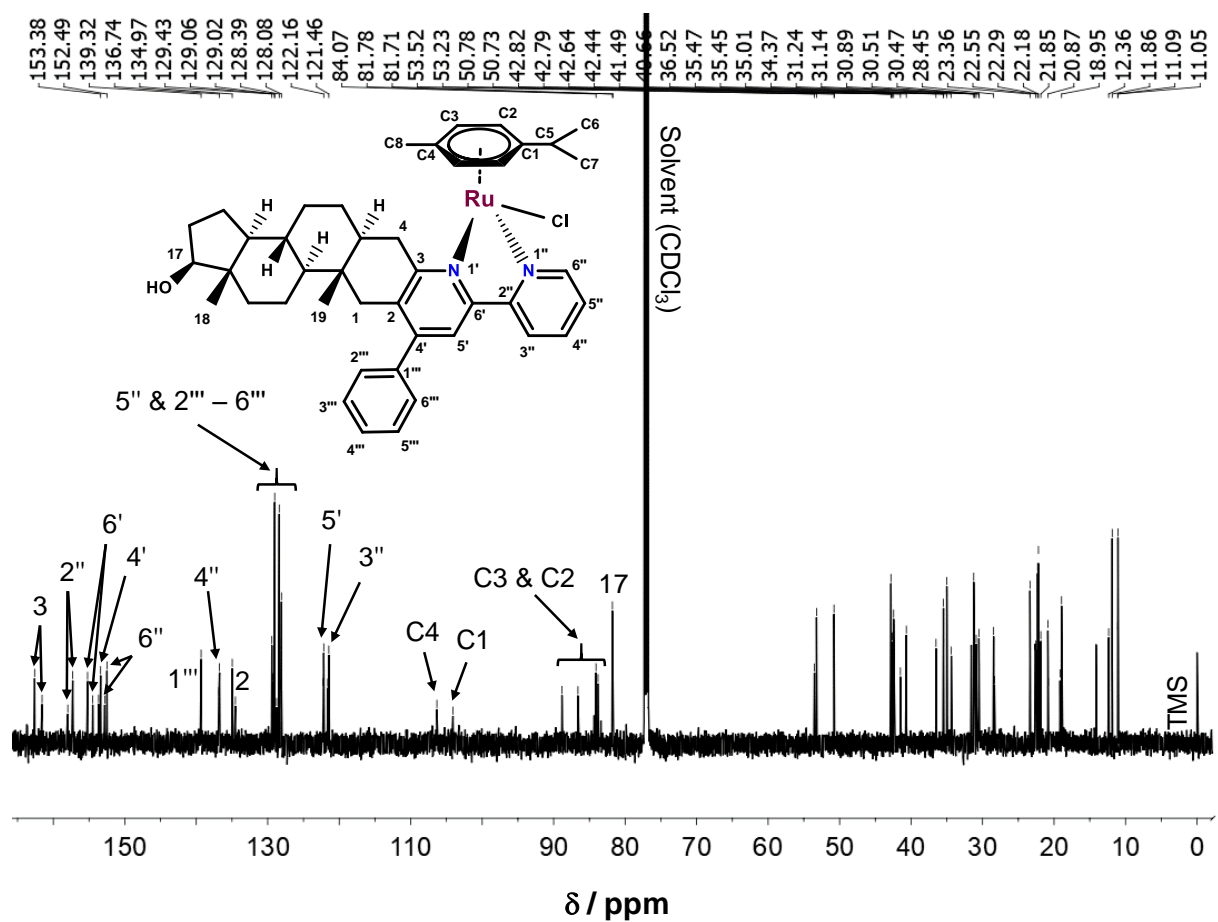

**Figure S8.**  $^{13}\text{C}$  NMR spectrum of [RuCym(4-Ph-bpy-St-OH)Cl]Cl (**4**) in  $\text{CDCl}_3$ . Inserted structure shows the numbering of peaks.

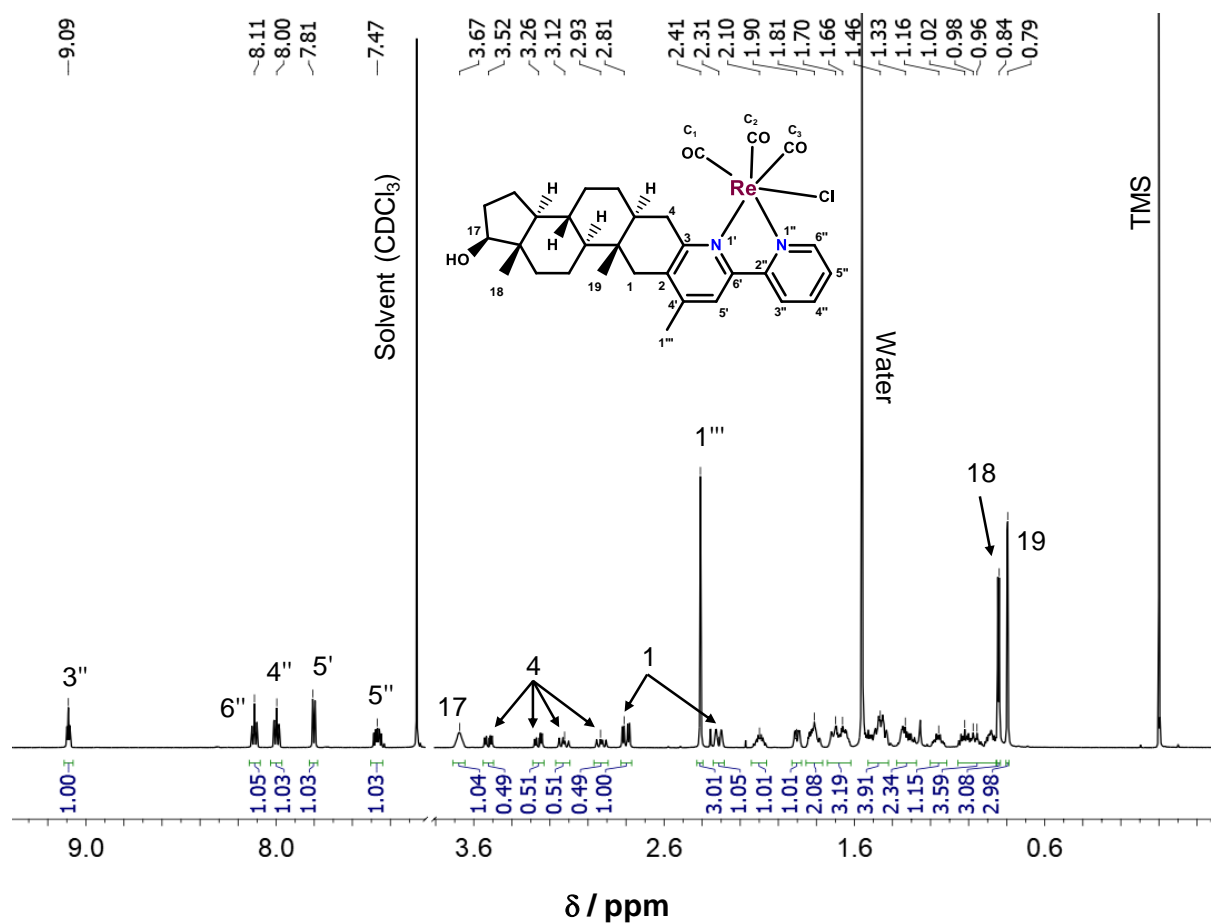

**Figure S9.**  $^1\text{H}$  NMR spectrum of  $[\text{Re}(\text{CO})_3(4\text{-Me-bpy-St-OH})\text{Cl}]$  (5) in  $\text{CDCl}_3$ . Inserted structure shows the numbering of peaks.

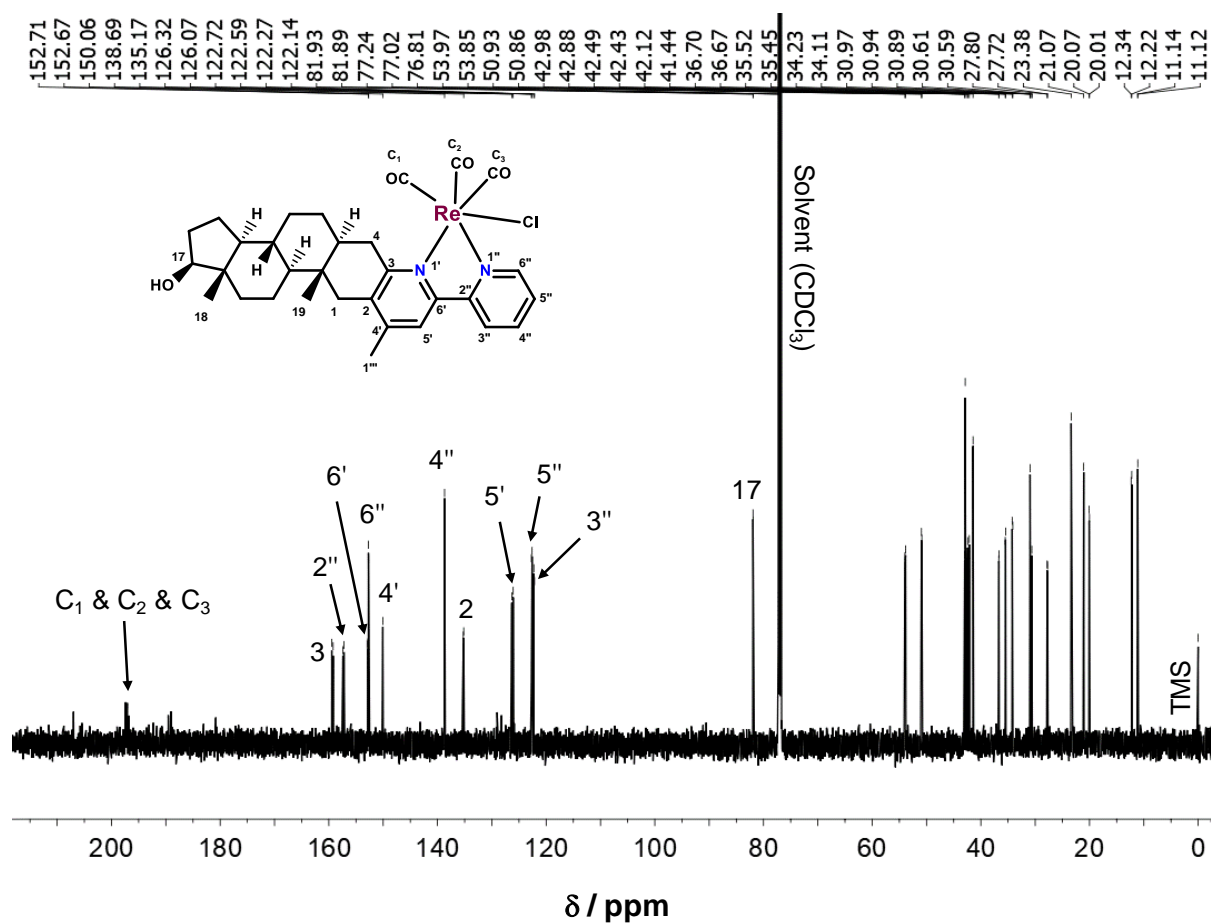

**Figure S10.** <sup>13</sup>C NMR spectrum of [Re(CO)<sub>3</sub>(4-Me-bpy-St-OH)Cl] (**5**) in CDCl<sub>3</sub>. Inserted structure shows the numbering of peaks.

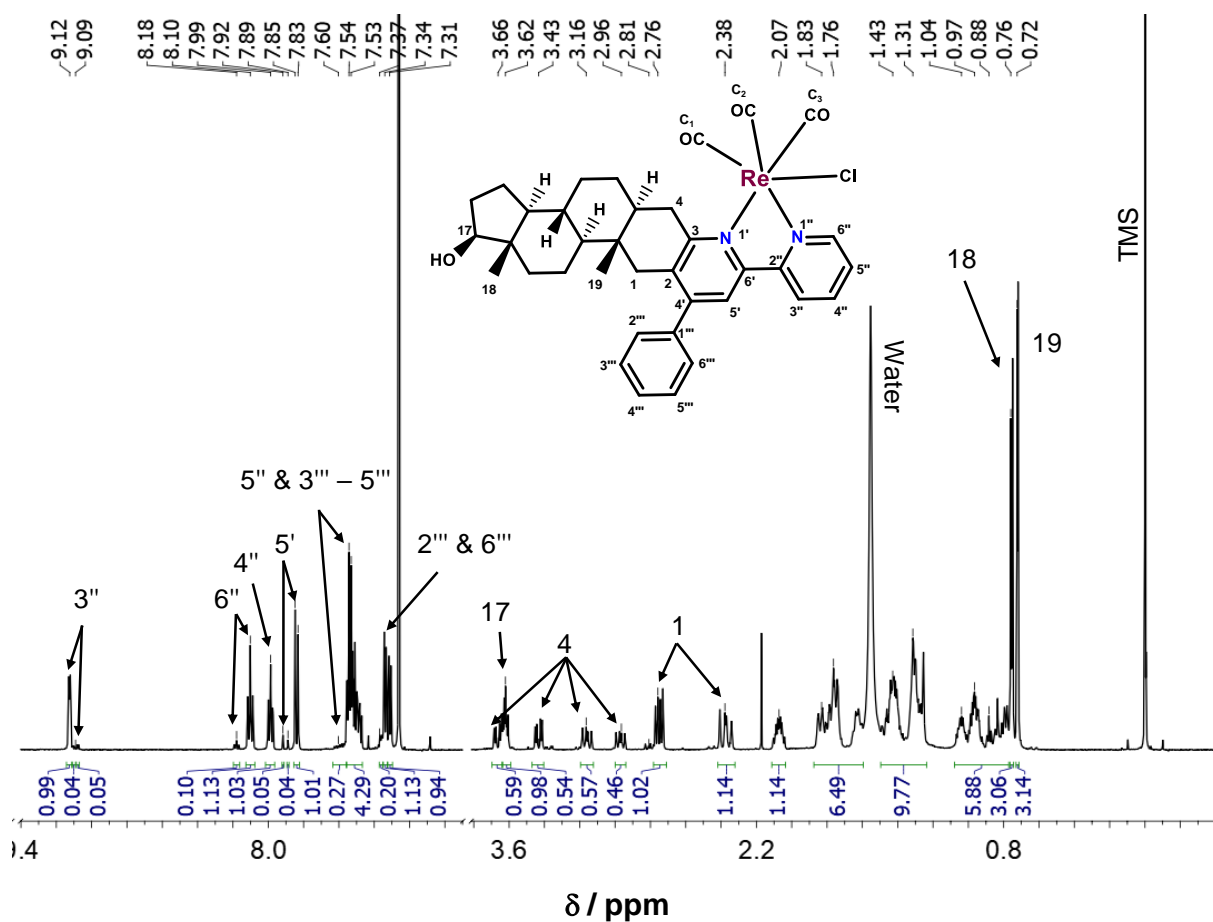

**Figure S11.**  $^1\text{H}$  NMR spectrum of  $[\text{Re}(\text{CO})_3(4\text{-Ph-bpy-St-OH})\text{Cl}]$  (6) in  $\text{CDCl}_3$ . Inserted structure shows the numbering of peaks.

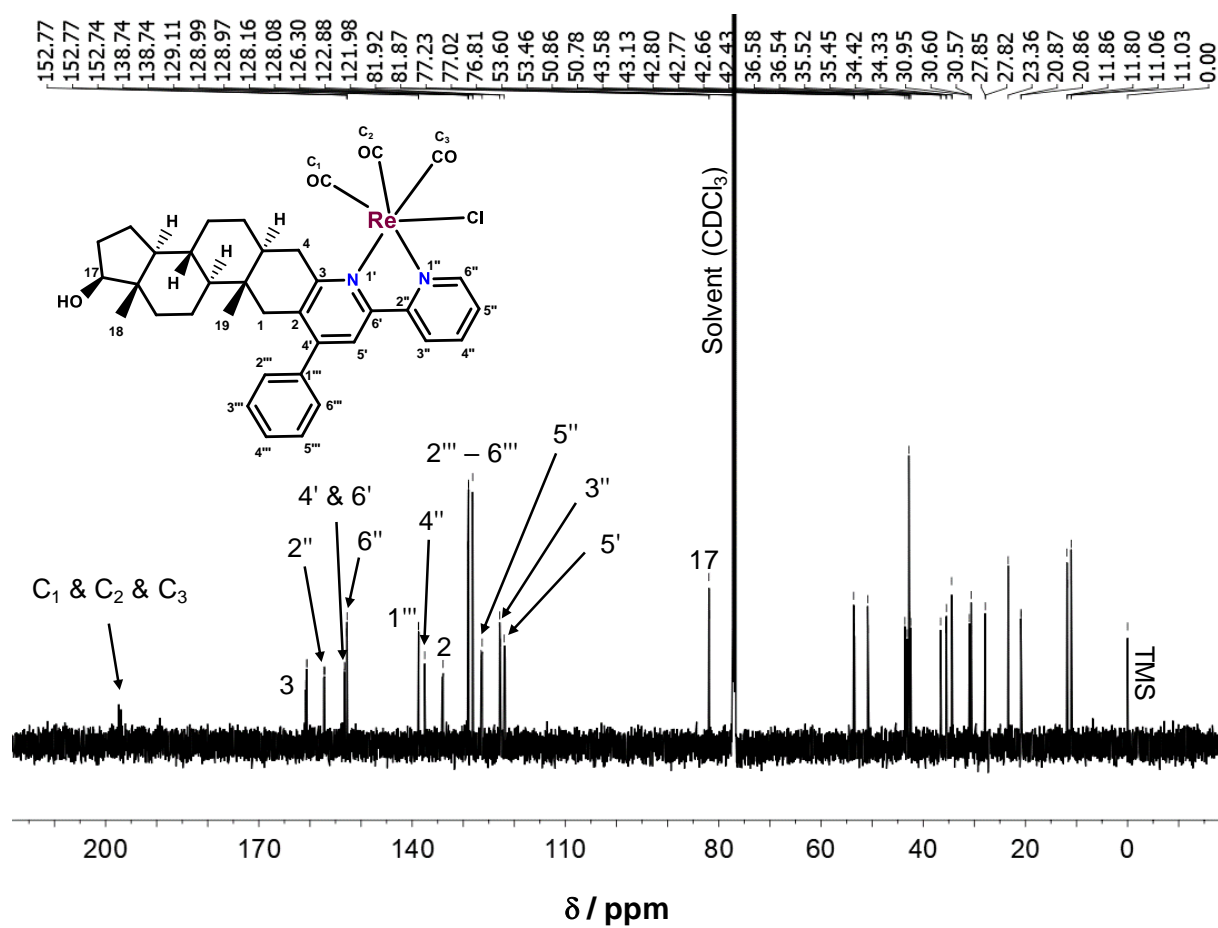

**Figure S12.**  $^{13}\text{C}$  NMR spectrum of  $[\text{Re}(\text{CO})_3(4\text{-Ph-bpy-St-OH})\text{Cl}]$  (6) in  $\text{CDCl}_3$ . Inserted structure shows the numbering of peaks.

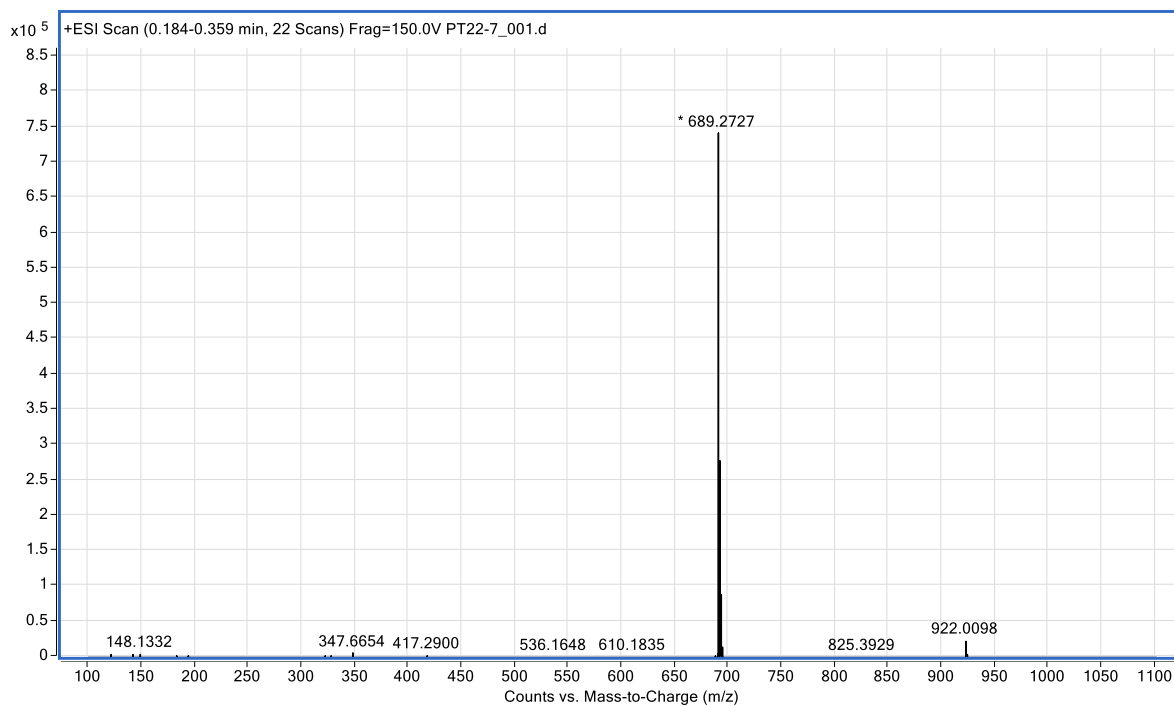

**Figure S13.** High resolution electrospray ionization MS (HR-ESI-MS) spectrum of  $[\text{RhCp}^*(4\text{-Me-bpy-St-OH})\text{Cl}]\text{Cl}$  (**1**) recorded in  $\text{CH}_3\text{CN}$ .

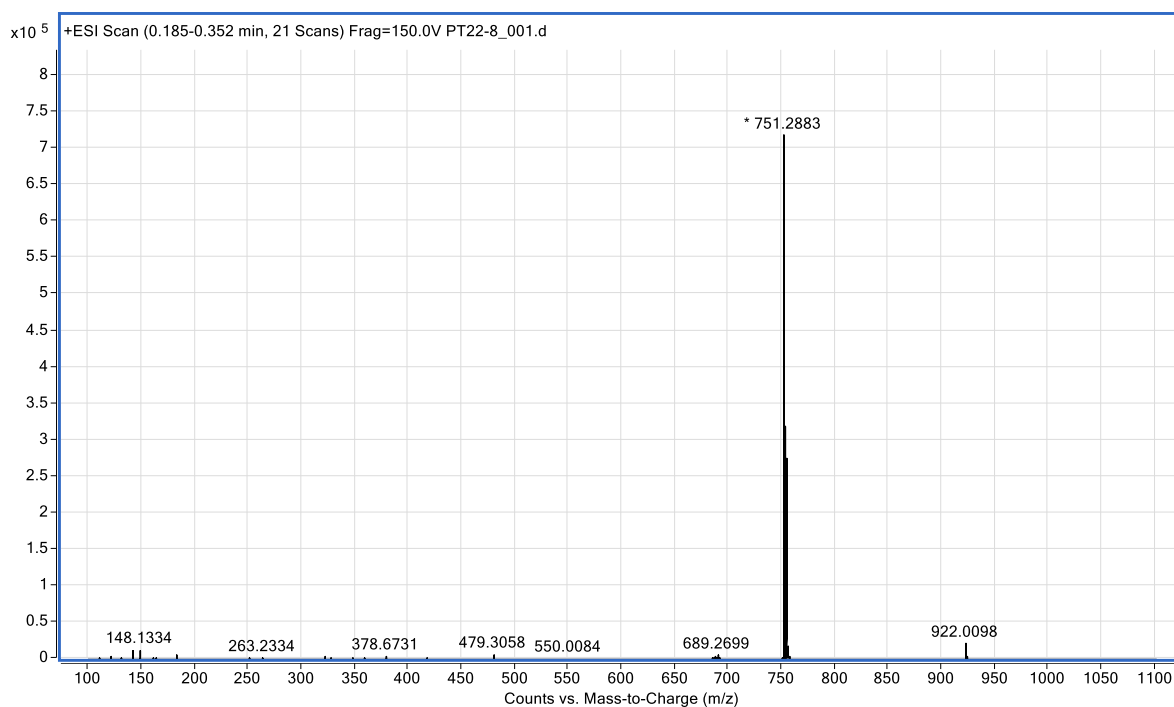

**Figure S14.** High resolution electrospray ionization MS (HR-ESI-MS) spectrum of  $[\text{RhCp}^*(4\text{-Ph-bpy-St-OH})\text{Cl}]\text{Cl}$  (**2**) recorded in  $\text{CH}_3\text{CN}$ .



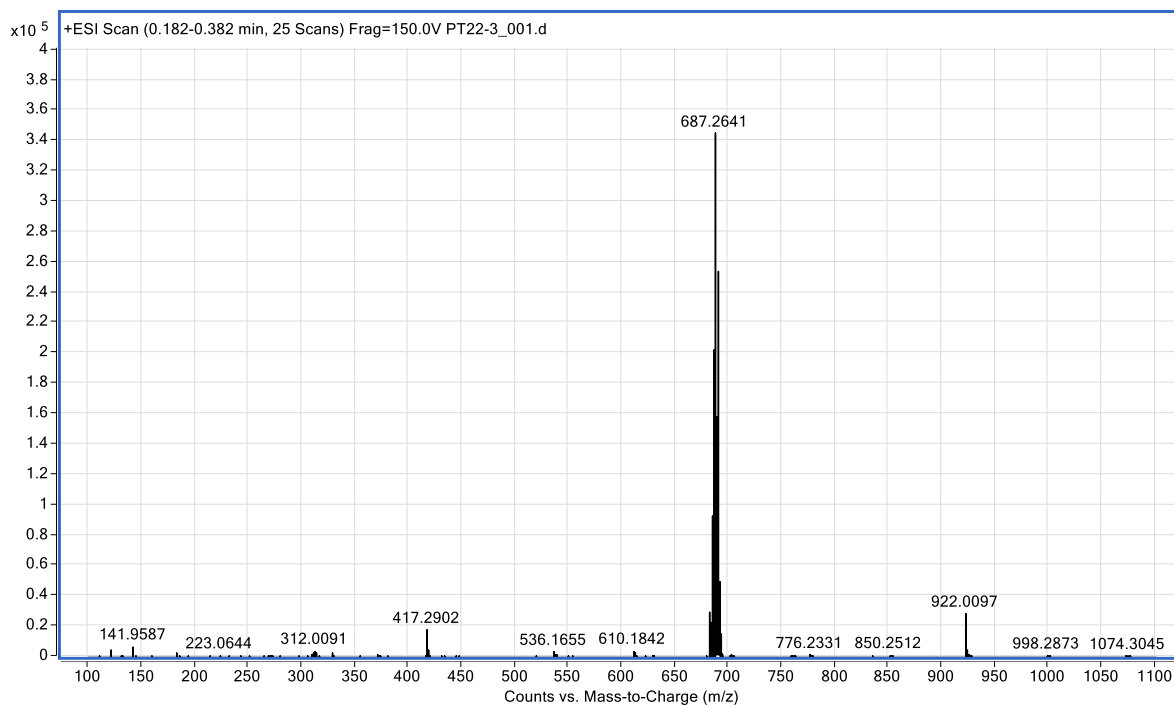

**Figure S15.** High resolution electrospray ionization MS (HR-ESI-MS) spectrum of [RuCym(4-Me-bpy-St-OH)Cl]Cl (**3**) recorded in CH<sub>3</sub>CN.

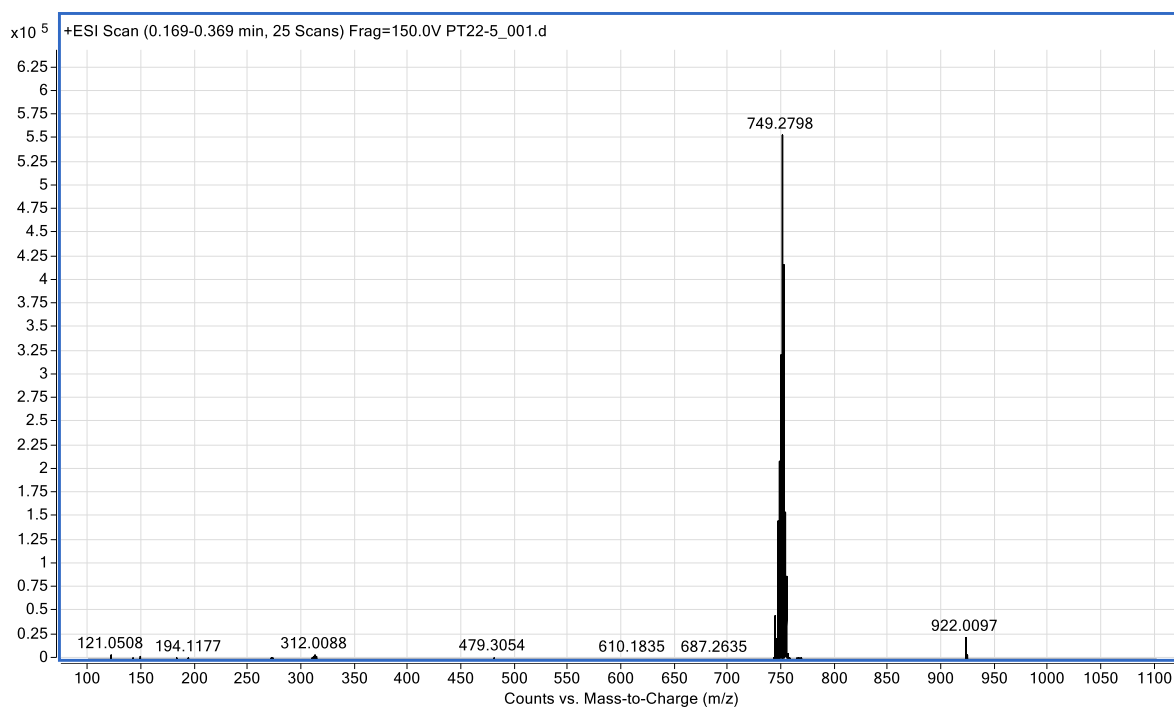

**Figure S16.** High resolution electrospray ionization MS (HR-ESI-MS) spectrum of [RuCym(4-Ph-bpy-St-OH)Cl]Cl (**4**) recorded in CH<sub>3</sub>CN.

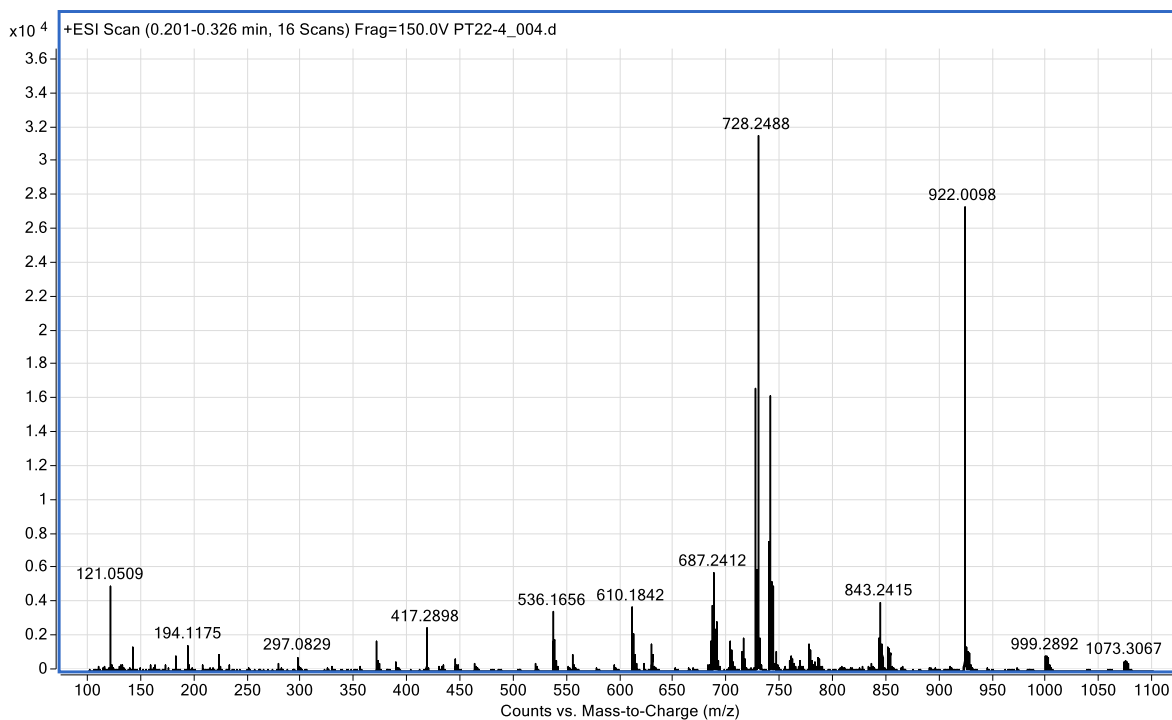

**Figure S17.** High resolution electrospray ionization MS (HR-ESI-MS) spectrum of [Re(CO<sub>3</sub>)(4-Me-bpy-St-OH)Cl] (5) recorded in CH<sub>3</sub>CN.

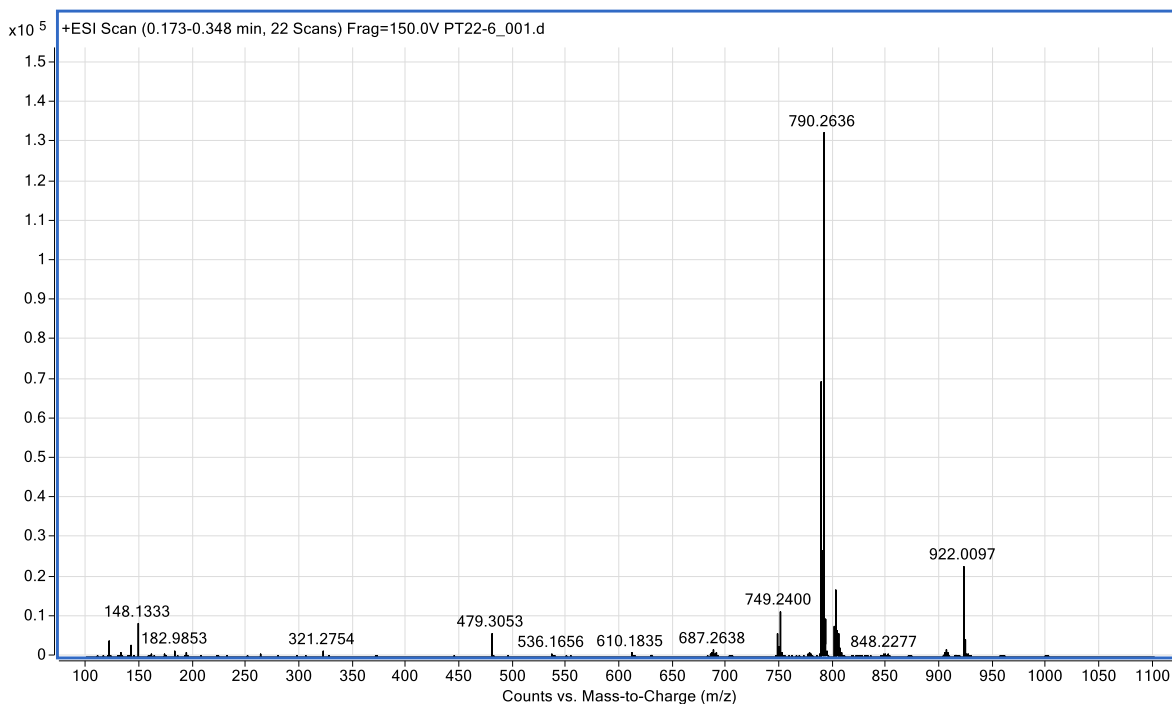

**Figure S18.** High resolution electrospray ionization MS (HR-ESI-MS) spectrum of [Re(CO<sub>3</sub>)(4-Ph-bpy-St-OH)Cl] (6) recorded in CH<sub>3</sub>CN.

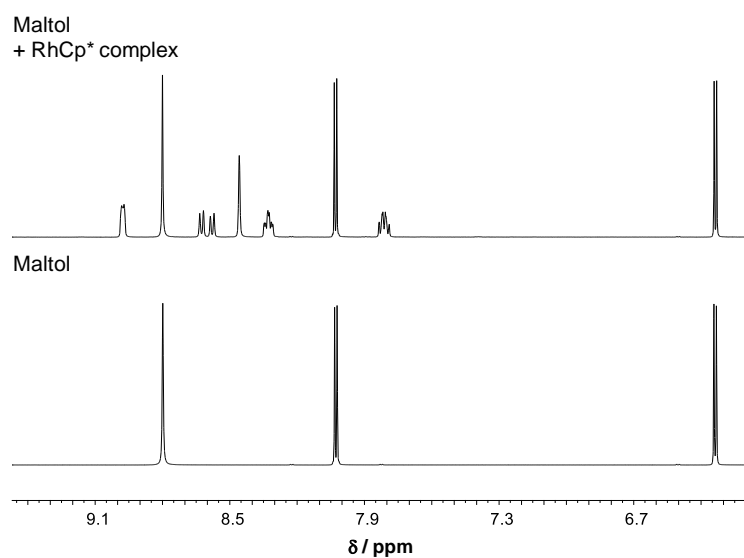

**Figure S19.** Quantitative-NMR: <sup>1</sup>H NMR spectrum of maltol and [RhCp\*(4-Me-bpy-St-OH)Cl]Cl (**1**) complex together with maltol in DMSO-*d*<sub>6</sub>. Based on the integrals the RhCp\* complex is found with 2 chloride ions and 4 water molecules.

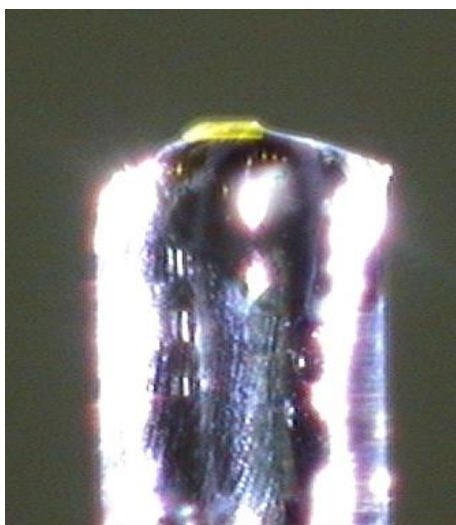

**Figure S20.** Photograph of the analysed crystal of complex [Re(CO)<sub>3</sub>(4-Me-bpy-St-OH)Cl] (**5**).

**Table S1.**  $\log D$  values at pH = 7.40 and  $pK_a$  values<sup>a</sup> of the (*N,O*) ligands along with the determined  $IC_{50}$  values (expressed in  $\mu M$ ) in human cancerous cell lines.

|                                                        | 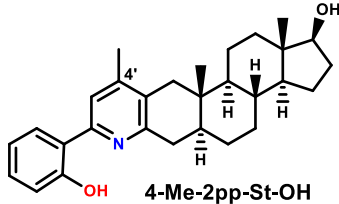<br>4-Me-2pp-St-OH | <br>4-Ph-2pp-St-OH |
|--------------------------------------------------------|-----------------------------------------------------------------------------------------------------|-------------------------------------------------------------------------------------------------------|
| <b><math>\log D_{7.40}</math></b>                      | + 3.01 ± 0.05                                                                                       | + 3.43 ± 0.25                                                                                         |
| <b><math>pK_{a1}</math>: <math>N1'_{2pp}H^+</math></b> | 5.21 <sup>a</sup>                                                                                   | 8.54 <sup>a</sup>                                                                                     |
| <b><math>pK_{a2}</math>: <math>OH_{phenol}</math></b>  | 4.49 <sup>a</sup>                                                                                   | 8.52 <sup>a</sup>                                                                                     |
| <b><math>IC_{50}</math> / <math>\mu M</math></b>       | LNCaP                                                                                               | >100                                                                                                  |
|                                                        | PC3                                                                                                 | >100                                                                                                  |
|                                                        | MCF-7                                                                                               | 8.7 ± 0.8                                                                                             |
|                                                        | Colo205                                                                                             | 3.9 ± 0.1                                                                                             |

<sup>a</sup> As precipitation was also observed even at higher DMSO content (60% (v/v) DMSO/H<sub>2</sub>O), UV-vis or <sup>1</sup>H NMR titrations could not be performed, the  $pK_a$  values were predicted by the Marvin software of ChemAxon.<sup>S11</sup>

**Reference SI1:** ChemAxon, Ltd. Instant J. Chem. / MarvinSketch; ChemAxon Ltd.: Budapest, Hungary, 2012.

**Table S2.** Crystallographic data for complex [Re(CO)<sub>3</sub>(4-Me-bpy-St-OH)Cl] (**5**).

| <b>Complex</b>                                 | <b>(5)</b>                                                         |
|------------------------------------------------|--------------------------------------------------------------------|
| CCDC No.                                       | 2302275                                                            |
| Empirical formula                              | C <sub>31</sub> H <sub>36</sub> ClN <sub>2</sub> O <sub>4</sub> Re |
| Formula weight                                 | 722.27                                                             |
| Temperature [K]                                | 150.00(10)                                                         |
| Crystal system                                 | triclinic                                                          |
| Space group                                    | P1                                                                 |
| a [Å]                                          | 8.9975(3)                                                          |
| b [Å]                                          | 12.9898(4)                                                         |
| c [Å]                                          | 13.9898(5)                                                         |
| α [°]                                          | 110.232(3)                                                         |
| β [°]                                          | 107.742(3)                                                         |
| γ [°]                                          | 91.611(3)                                                          |
| Volume [Å <sup>3</sup> ]                       | 1444.82(9)                                                         |
| Z                                              | 2                                                                  |
| ρ <sub>calc</sub> [g cm <sup>-3</sup> ]        | 1.660                                                              |
| μ [mm <sup>-1</sup> ]                          | 4.336                                                              |
| F(000)                                         | 720.0                                                              |
| Crystal size [mm <sup>3</sup> ]                | 0.1 × 0.08 × 0.02                                                  |
| Radiation                                      | Mo Kα<br>(λ = 0.71073)                                             |
| 2θ range for data collection [°]               | 4.802 to 58.912                                                    |
| Index ranges                                   | -12 ≤ h ≤ 12,<br>-17 ≤ k ≤ 17,<br>-19 ≤ l ≤ 19                     |
| Reflections collected                          | 20202<br>12182                                                     |
| Independent reflections                        | [R <sub>int</sub> = 0.0378,<br>R <sub>sigma</sub> = 0.0656]        |
| Data/restraints/parameters                     | 12182/3/651                                                        |
| Goodness-of-fit on F <sup>2</sup>              | 0.975                                                              |
| Final R indexes [I ≥ 2σ (I)]                   | R <sub>1</sub> = 0.0320,<br>wR <sub>2</sub> = 0.0578               |
| Final R indexes [all data]                     | R <sub>1</sub> = 0.0416,<br>wR <sub>2</sub> = 0.060                |
| Largest diff. peak / hole [e Å <sup>-3</sup> ] | 1.26/-1.35                                                         |
| Flack parameter                                | -0.036(9)                                                          |

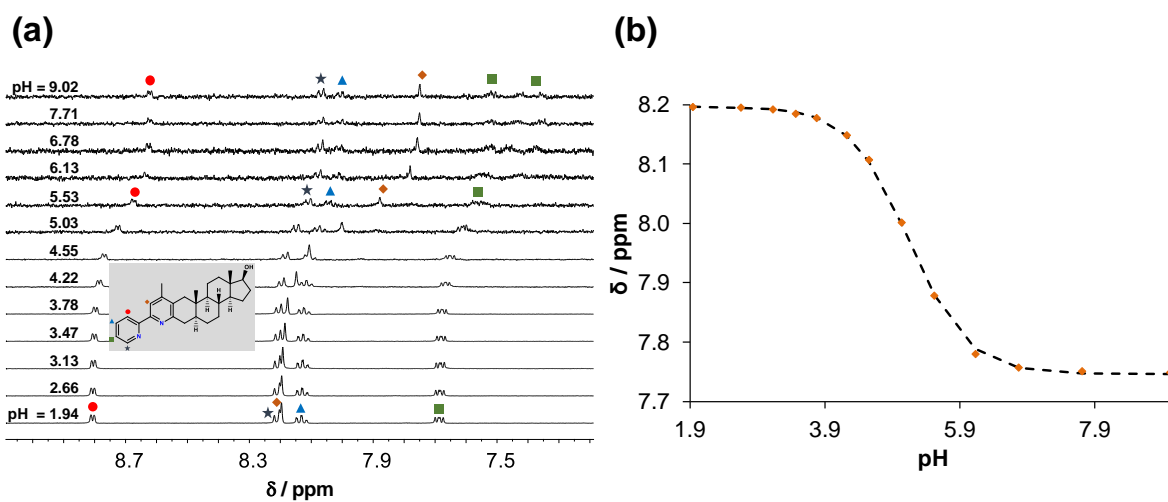

**Figure S21.** (a)  $^1\text{H}$  NMR spectra of 4-Me-bpy-St-OH in the low-field region at different pH values, and (b) chemical shift values of the C(5')H proton ( $\blacklozenge$ ) along with the fitted (dashed) line.  $\{c_{\text{ligand}} = 680 \mu\text{M}, I = 0.10 \text{ M KCl}, 30\% (v/v) \text{ DMSO-}d_6/\text{H}_2\text{O}\}$

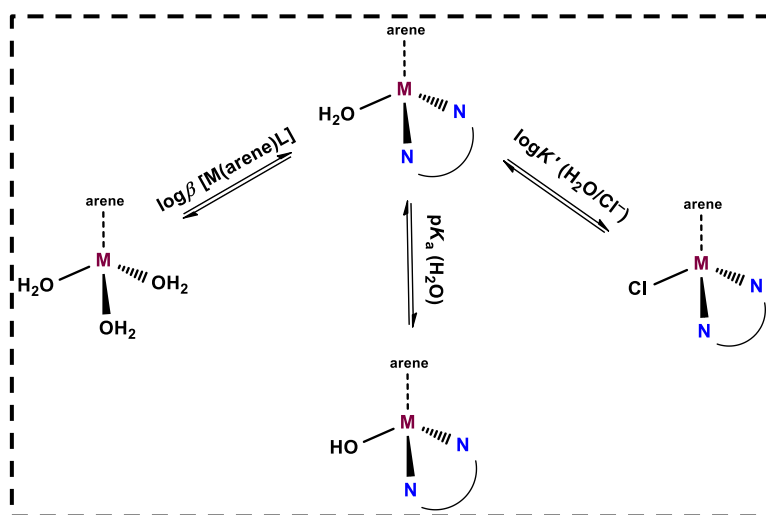

**Scheme S1.** Solution equilibrium processes occurring in the solution of the half-sandwich RuCym and RhCp\* complexes.



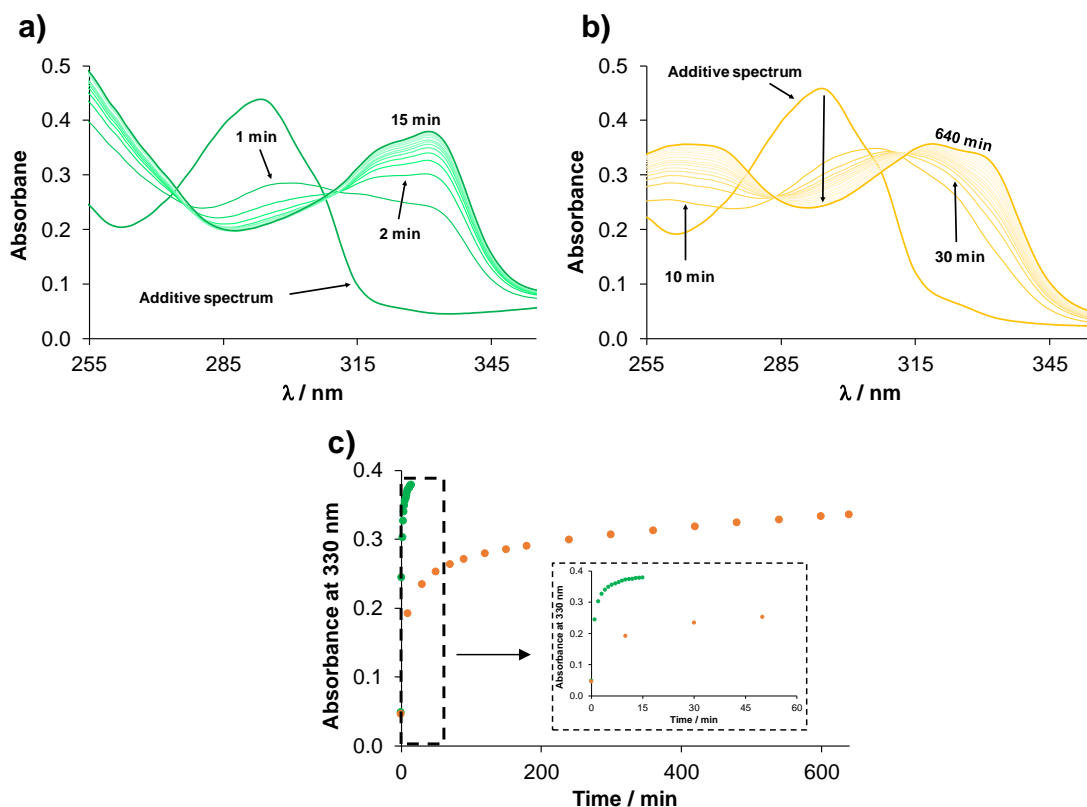

**Figure S22.** Complex formation process in time for (a) RhCp\* – 4-Me-bpy-St-OH and (b) RuCym – 4-Me-bpy-St-OH (1:1) systems at pH = 4.0 followed by UV-vis spectrophotometry. (c) Absorbance values at 330 nm as a function of time: RhCp\* (●), RuCym (●).  $\{c_{\text{RuCym/RhCp}^*} = c_{\text{ligand}} = 30 \mu\text{M}, T = 25.0 \text{ }^\circ\text{C}, \ell = 1 \text{ cm}, 30\% \text{ (v/v) DMSO/H}_2\text{O}\}$

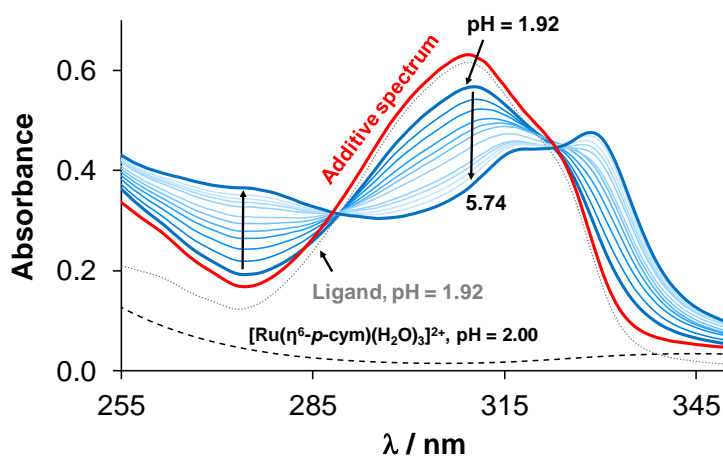

**Figure S23.** UV-vis spectra of the RuCym – 4-Me-bpy-St-OH (1:1) system at various pH values (1.92 → 5.74). The spectrum of the organometallic triaqua cation (black dashed line), ligand (grey dotted line) and their additive spectrum (red solid line) are also indicated. Notably, the aqua co-ligands are replaced partly by chlorido ligands in the presence of chloride ions.  $\{c_{\text{RuCym}} = c_{\text{ligand}} = 30 \mu\text{M}, I = 0.10 \text{ M KCl}, T = 25.0 \text{ }^\circ\text{C}, \ell = 1 \text{ cm}, 30\% \text{ (v/v) DMSO/water}\}$

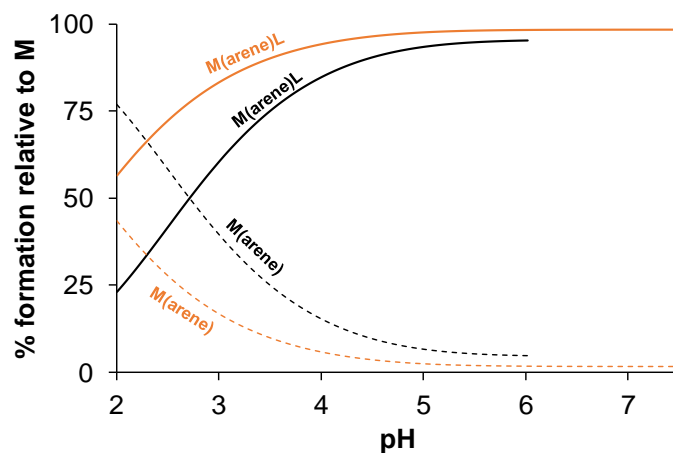

**Figure S24.** Concentration distribution curves calculated for the RhCp\* – 4-Me-bpy-St-OH (orange, solid and dashed lines) and for the RuCym – 4-Me-bpy-St-OH (black, solid and dashed lines) (1:1) systems.  $\{c_{\text{ligand}} = c_{\text{RhCp}^*/\text{RuCym}} = 30 \mu\text{M}, I = 0.10 \text{ M KCl}, T = 25.0 \text{ }^\circ\text{C}, 30\% (v/v) \text{ DMSO}/\text{H}_2\text{O}\}$

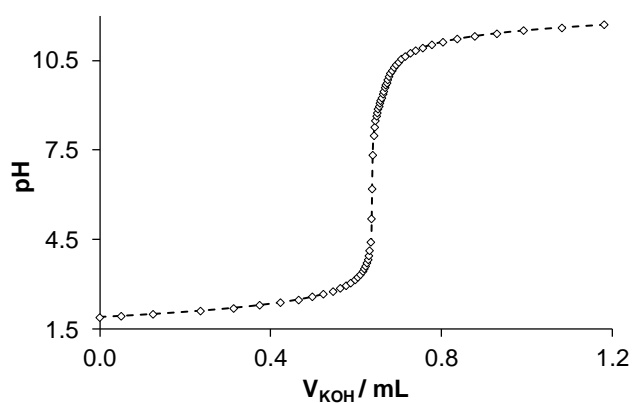

**Figure S25.** pH-potentiometric titration curve of the [RhCp\*(4-Me-bpy-St-OH)Cl]Cl complex (**1**) ( $\diamond$ ) along with the fitted (dashed) line  $\{c_{\text{complex}} = 660 \mu\text{M}, I = 0.20 \text{ M KNO}_3, T = 25.0 \text{ }^\circ\text{C}\}$

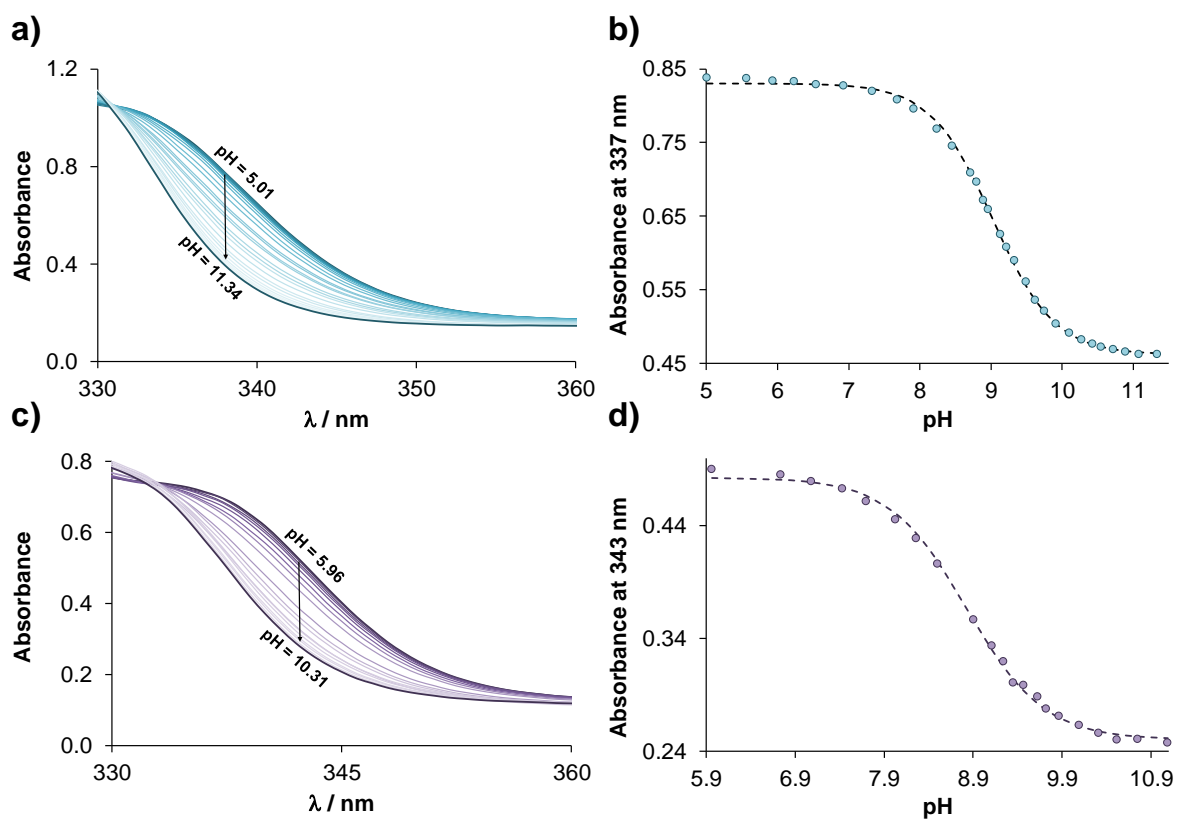

**Figure S26.** (a) UV-vis spectra of the  $[\text{RhCp}^*(4\text{-Me-bpy-St-OH})\text{Cl}]\text{Cl}$  complex (**1**) at various pH values (5.01  $\rightarrow$  11.34). (b) Absorbance values at 337 nm (O) as a function of pH together with the fitted curve.  $\{c_{(1)} = 158 \mu\text{M}, I = 0.20 \text{ M KNO}_3, T = 25.0 \text{ }^\circ\text{C}, \ell = 1 \text{ cm}\}$  (c) UV-vis spectra of the  $[\text{RhCp}^*(4\text{-Ph-bpy-St-OH})\text{Cl}]\text{Cl}$  complex (**2**) at various pH values (5.96  $\rightarrow$  10.31). (d) Absorbance values at 343 nm for the same complex as a function of pH.  $\{c_{(2)} = 103 \mu\text{M}, I = 0.20 \text{ M KNO}_3, T = 25.0 \text{ }^\circ\text{C}, \ell = 1 \text{ cm}\}$

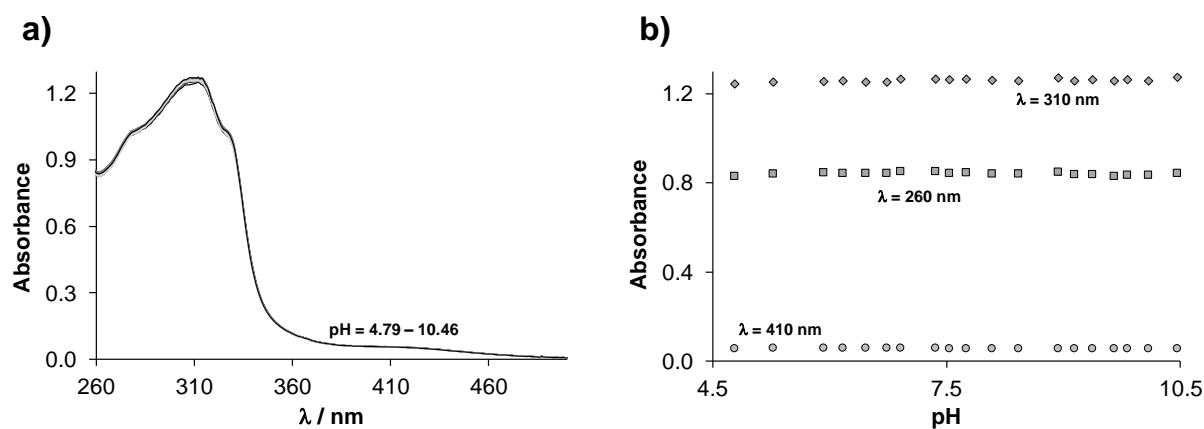

**Figure S27.** (a) UV-vis spectra of the  $[\text{RuCym}(4\text{-Me-bpy-St-OH})\text{Cl}]\text{Cl}$  complex (**3**) at various pH values (4.79  $\rightarrow$  10.36). (b) Absorbance values at different wavelengths as a function of pH.  $\{c_{(3)} = 123 \mu\text{M}, I = 0.20 \text{ M KNO}_3, T = 25.0 \text{ }^\circ\text{C}, \ell = 1 \text{ cm}\}$

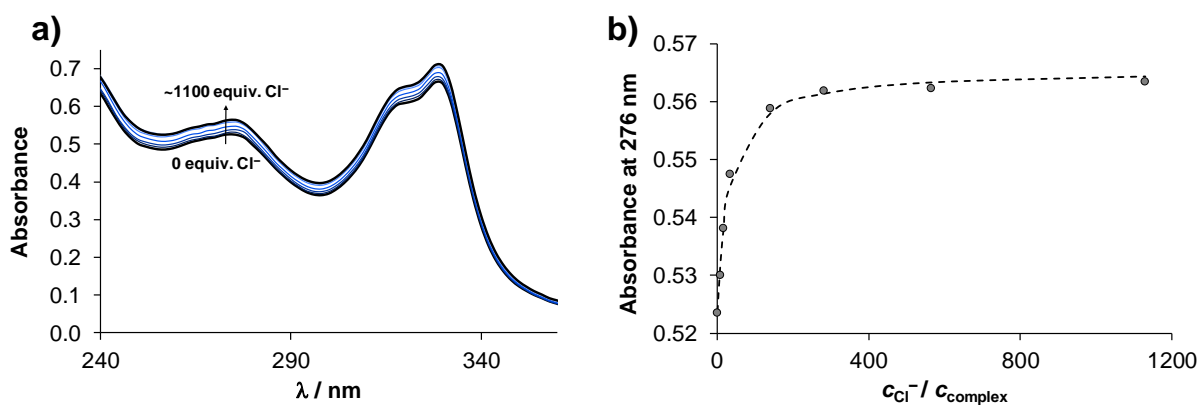

**Figure S28.** (a) UV-vis spectra of [RuCym(4-Me-bpy-St-OH)Cl]Cl (**3**) in the absence and presence of various equivalents of chloride ions. (b) Absorbance values at 276 nm as a function of  $c_{\text{Cl}^-} / c_{\text{complex}}$  ratio along with the fitted (dashed) line.  $\{c_{(3)} = 237 \mu\text{M}; \text{pH} = 7.40$  (phosphate buffer);  $l = 0.20 \text{ M KNO}_3$ ;  $\ell = 0.2 \text{ cm}; T = 25.0 \text{ }^\circ\text{C}\}$

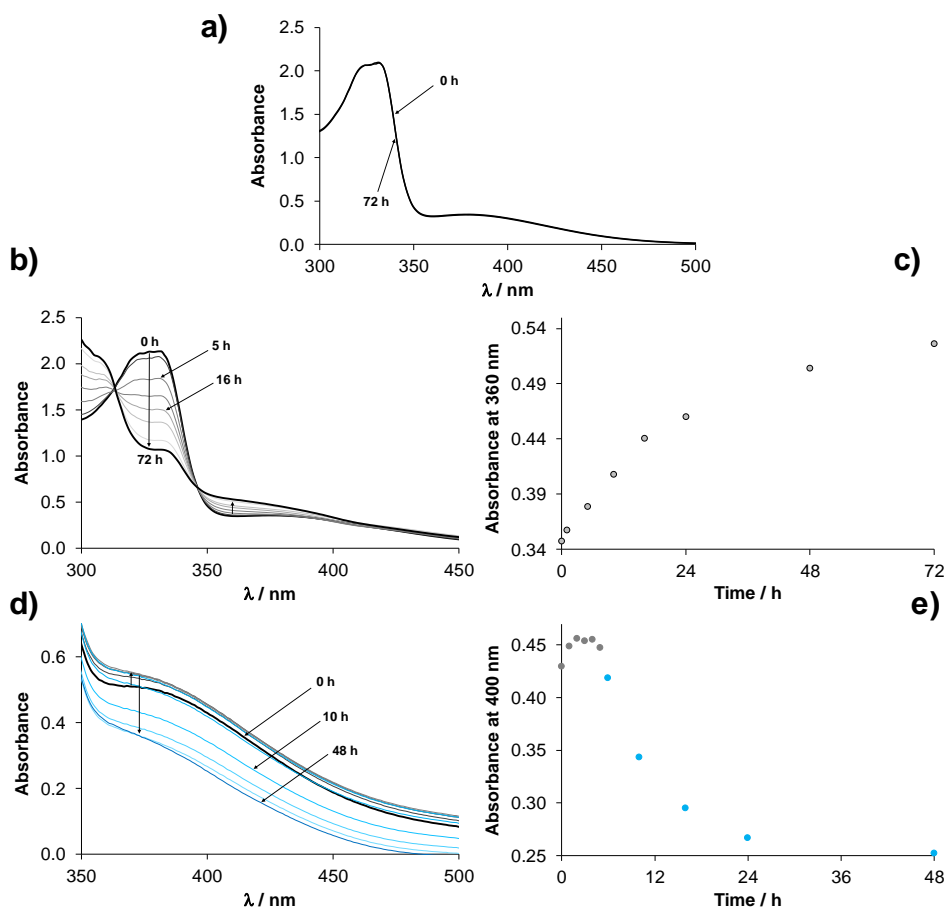

**Figure S29.** UV-vis spectra of the [RhCp\*(4-Ph-bpy-St-OH)Cl]Cl complex (**2**) in (a) PBS' buffer (pH = 7.40), (b) RPMI-1640 biological medium and d) blood serum. Absorbance values at 360 and 400 nm as a function of time in the case of (c) RPMI-1640 and (e) blood serum.  $\{c_{(2)} = 150 \mu\text{M}, T = 25.0 \text{ }^\circ\text{C}, \ell = 1 \text{ cm}\}$

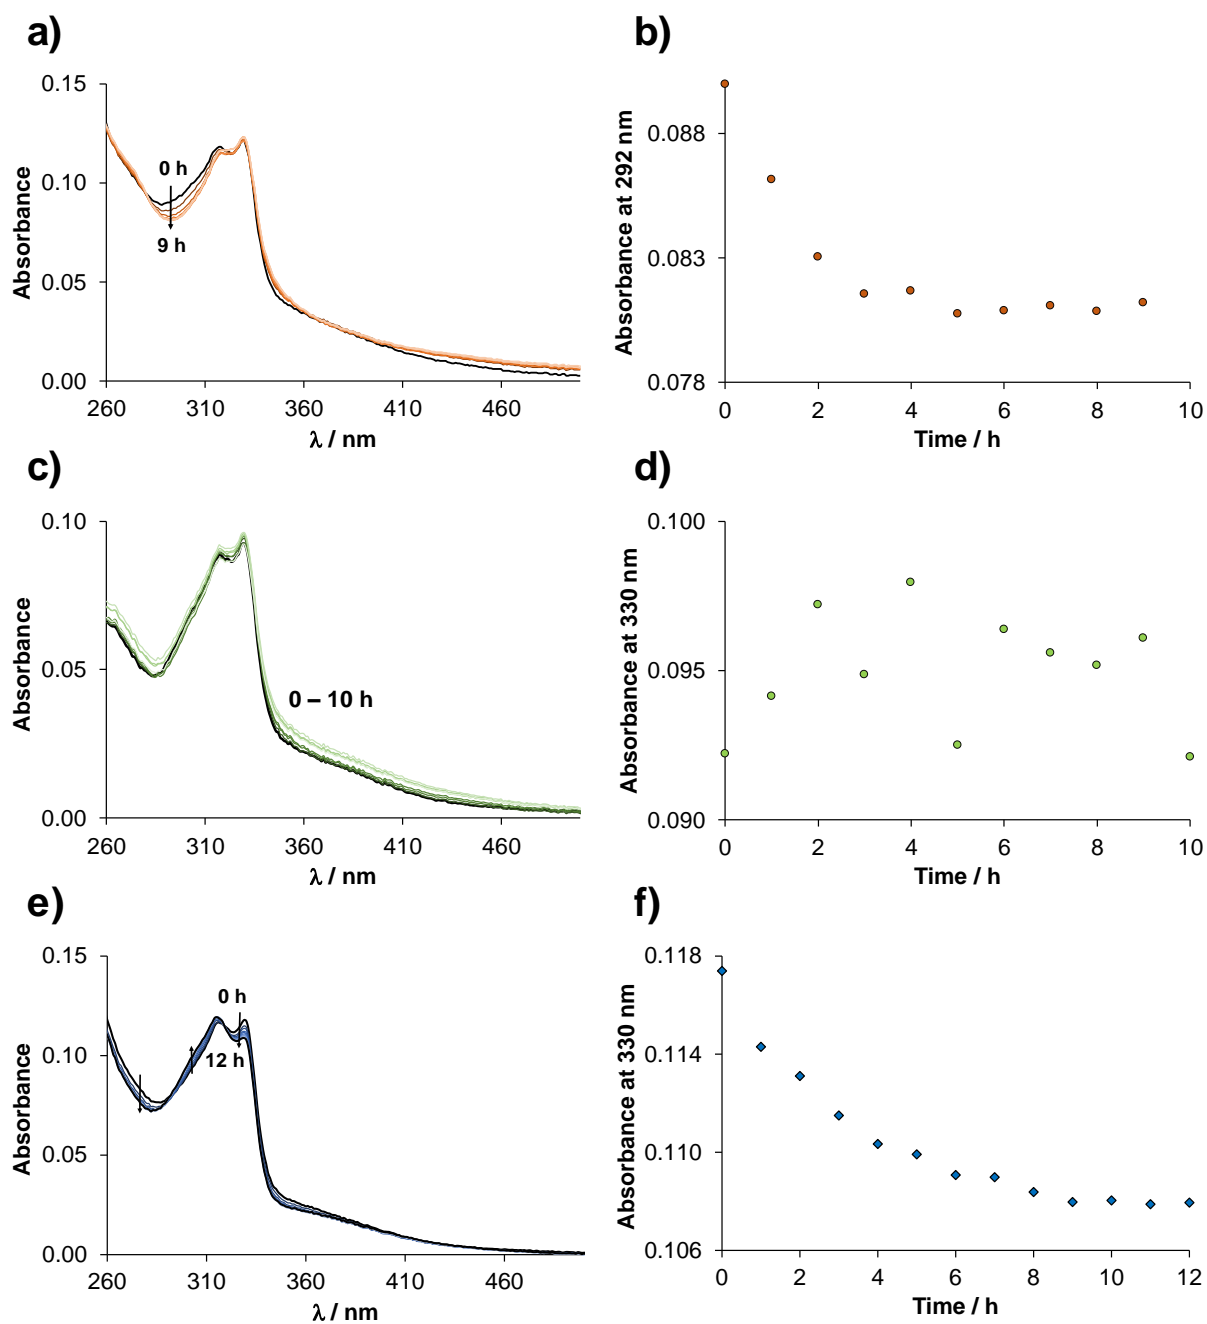

**Figure S30.** UV-vis spectra of [Re(CO)<sub>3</sub>(4-Me-bpy-St-OH)Cl] (5) in 30% (v/v) DMSO/H<sub>2</sub>O at a) pH = 5.1; c) pH = 7.0 and e) pH = 12.2 followed in time. Absorbance values at 292 (b) or 330 nm (d, f) for the same systems, respectively. { $c_{(5)}$  = 10 μM;  $T$  = 25.0 °C;  $\ell$  = 1 cm; 30% (v/v) DMSO/H<sub>2</sub>O; PBS' buffer (pH = 7.0)}.

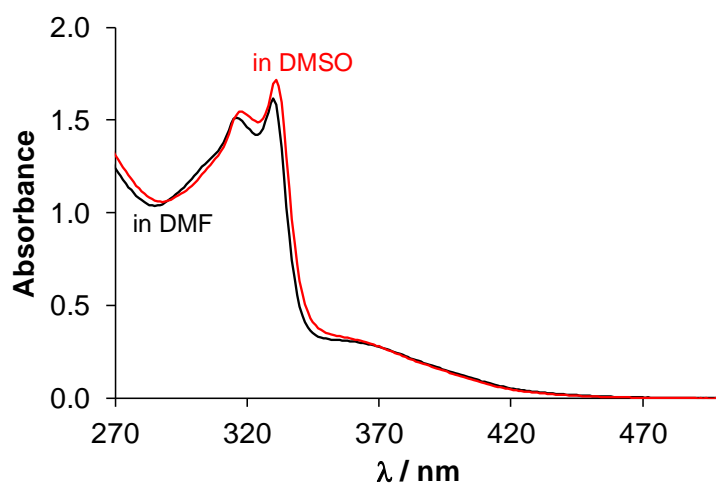

**Figure S31.** UV-vis spectra of  $[\text{Re}(\text{CO})_3(4\text{-Me-bpy-St-OH})\text{Cl}]$  (**5**) in DMF and DMSO.  $\{c_{(5)} = 100 \mu\text{M}; T = 25.0 \text{ }^\circ\text{C}; \ell = 1 \text{ cm}\}$

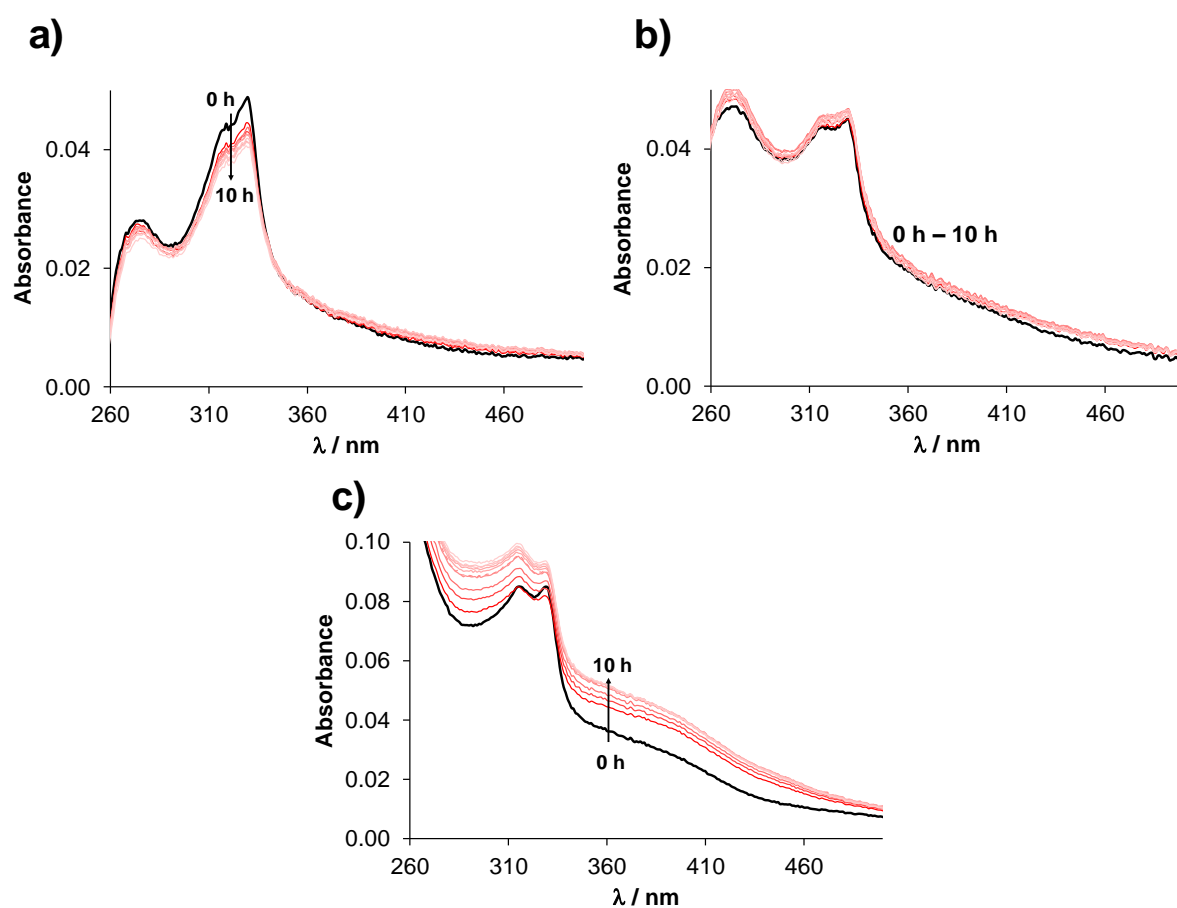

**Figure S32.** UV-vis spectra of  $[\text{Re}(\text{CO})_3(4\text{-Me-bpy-St-OH})\text{Cl}]$  (**5**) in 30% (v/v) DMF/ $\text{H}_2\text{O}$  mixture at a) pH = 1.9; b) pH = 4.9 and c) pH = 11.2 followed in time.  $\{c_{(5)} = 8 \mu\text{M}; T = 25.0 \text{ }^\circ\text{C}; \ell = 1 \text{ cm}; 30\% \text{ (v/v) DMF}/\text{H}_2\text{O}\}$ .



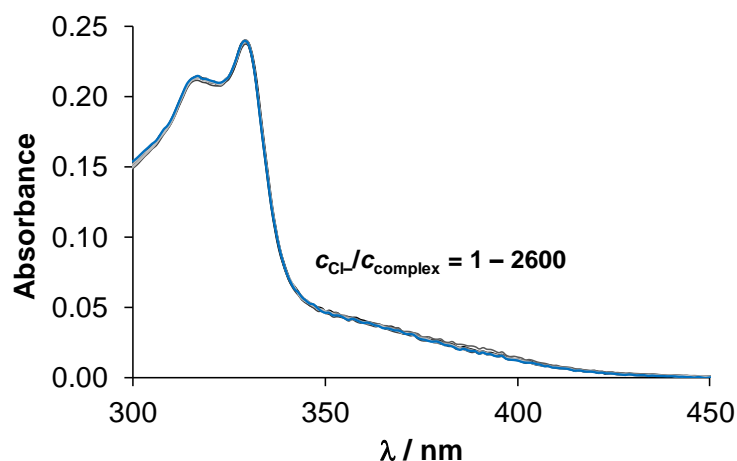

**Figure S33.** UV-vis spectra of  $[\text{Re}(\text{CO})_3(4\text{-Me-bpy-St-OH})\text{Cl}]$  (**5**) in 60% (v/v) DMF/ $\text{H}_2\text{O}$  mixture at increasing chloride ion concentration at pH 7.40.  $\{c_{(5)} = 14 \mu\text{M}; T = 25.0 \text{ }^\circ\text{C}; \ell = 1 \text{ cm}; 60\% \text{ (v/v) DMF}/\text{H}_2\text{O}\}$

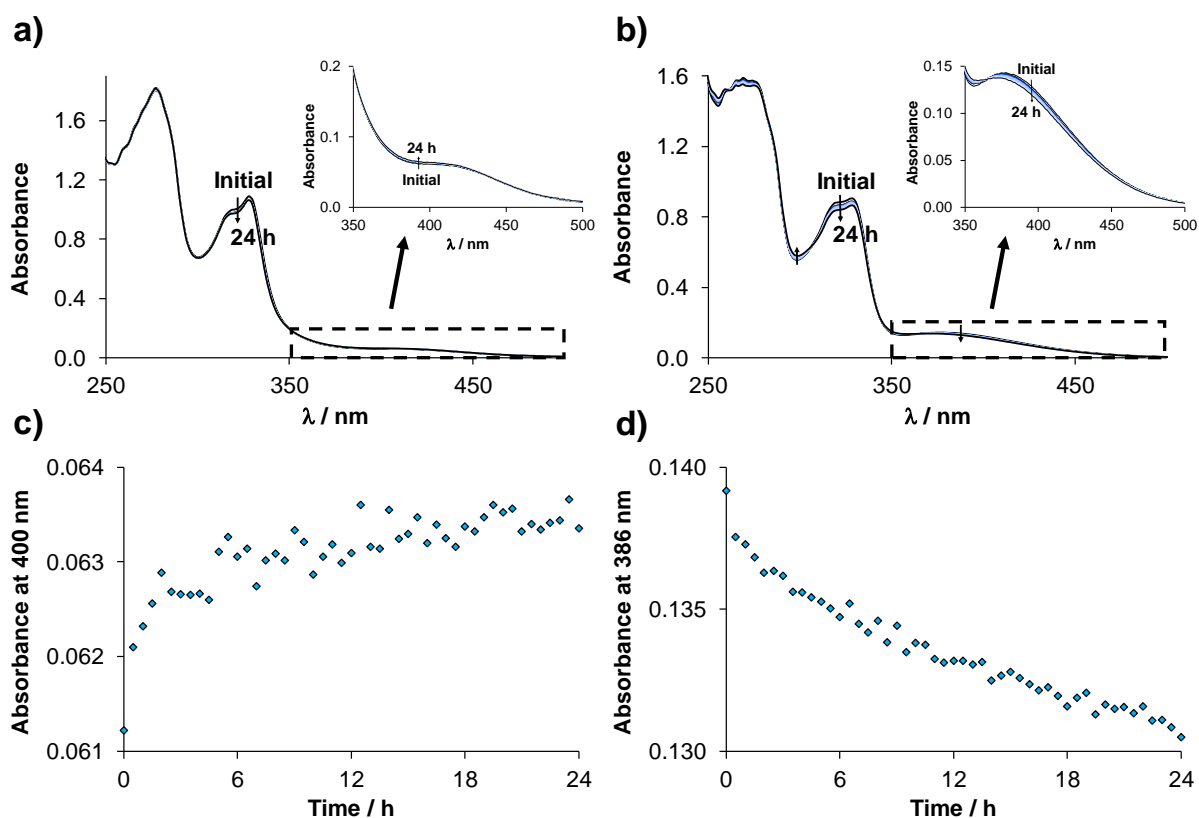

**Figure S34.** UV-vis spectra of (a)  $[\text{RuCym}(4\text{-Me-bpy-St-OH})\text{Cl}]\text{Cl}$  (**3**) complex and (b)  $[\text{RhCp}^*(4\text{-Me-bpy-St-OH})\text{Cl}]\text{Cl}$  (**1**) in the presence of half equiv. HSA followed in time. Inset shows the charge-transfer region (350 – 500 nm) of the complexes. Absorbance values at (c) 400 nm and (d) 386 nm as a function of time for the same RuCym and RhCp\* complex, respectively.  $\{c_{\text{complex}} = 70 \mu\text{M}; c_{\text{HSA}} = 35 \mu\text{M}; \text{pH} = 7.40 \text{ (PBS' buffer)}; \ell = 1 \text{ cm}; T = 25.0 \text{ }^\circ\text{C}\}$

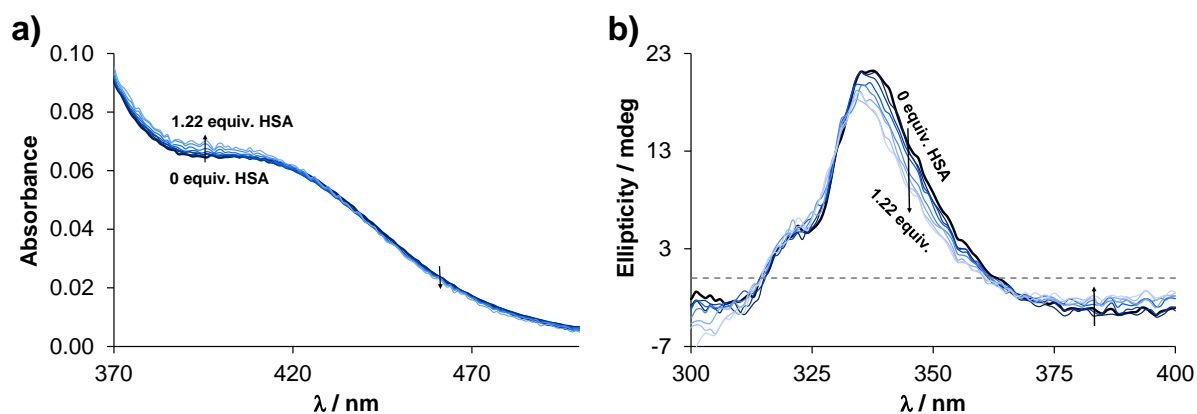

**Figure S35.** (a) UV-vis spectra and (b) CD spectra of [RuCym(4-Me-bpy-St-OH)Cl]Cl complex (**3**) in the absence and presence of various equivalents of HSA.  $\{c_{(3)} = 86 \mu\text{M}; c_{\text{HSA}} = 0 - 105 \mu\text{M}; \text{pH} = 7.40 \text{ (PBS' buffer)}; \ell = 1 \text{ (UV-vis) or } 0.5 \text{ (CD) cm}; T = 25.0 \text{ }^\circ\text{C}\}$

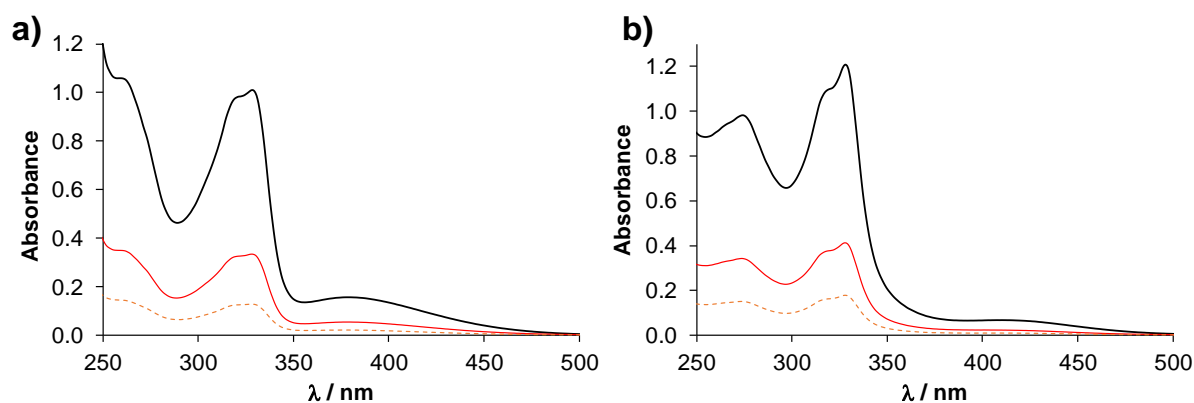

**Figure S36.** UV-vis spectra of ultrafiltrated (a) [RhCp\*(4-Me-bpy-St-OH)Cl]Cl (**1**) and (b) [RuCym(4-Me-bpy-St-OH)Cl]Cl (**3**) complexes in the absence (red solid line) and presence of HSA (orange dashed line) along with the nonfiltered reference spectrum (black solid line).  $\{c_{\text{complex}} = 71 \mu\text{M}; c_{\text{HSA}} = 35 \mu\text{M}; \text{pH} = 7.40 \text{ (PBS' buffer)}; \ell = 1 \text{ cm}; T = 25.0 \text{ }^\circ\text{C}\}$

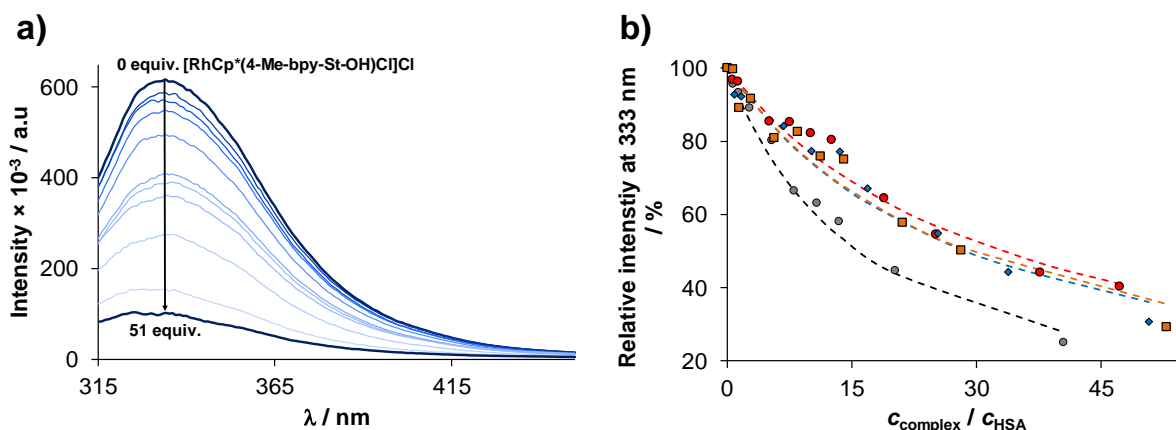

**Figure S37.** (a) Fluorescence emission spectra of HSA in the absence and presence of various amount of  $[\text{RhCp}^*(4\text{-Me-bpy-St-OH})\text{Cl}]\text{Cl}$  complex (**1**). (b) Experimental and calculated (dashed lines) relative emission intensities of HSA at 333 nm in the presence of various amounts of  $[\text{RhCp}^*(4\text{-Me-bpy-St-OH})\text{Cl}]\text{Cl}$  (**1**) ( $\bullet$ ),  $[\text{RhCp}^*(4\text{-Ph-bpy-St-OH})\text{Cl}]\text{Cl}$  (**2**) ( $\bullet$ ),  $[\text{RuCym}(4\text{-Me-bpy-St-OH})\text{Cl}]\text{Cl}$  (**3**) ( $\blacklozenge$ ) and  $[\text{RuCym}(4\text{-Ph-bpy-St-OH})\text{Cl}]\text{Cl}$  (**4**) ( $\blacksquare$ ) complexes.  $\{c_{\text{HSA}} = 1 \mu\text{M}; c_{\text{complex}} = 0 - 53 \mu\text{M}; \lambda_{\text{EX}} = 295 \text{ nm}; \text{pH} = 7.40 \text{ (PBS' buffer)}; T = 25 \text{ }^\circ\text{C}; \ell = 1 \text{ cm}\}$

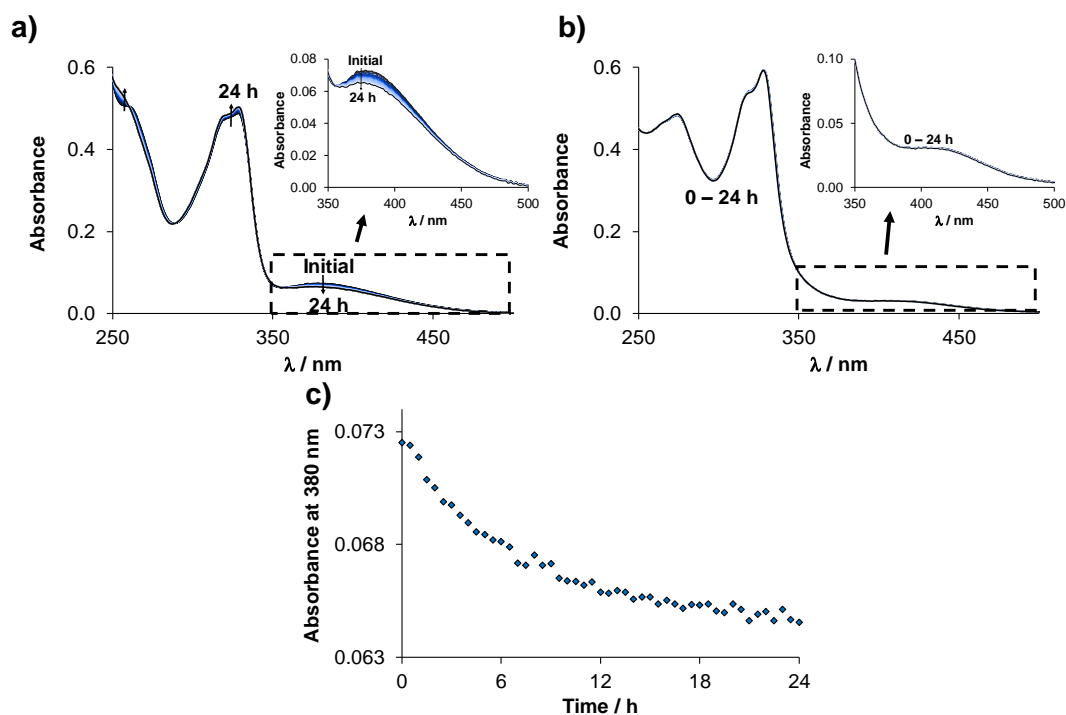

**Figure S38.** UV-vis spectra of (a)  $[\text{RhCp}^*(4\text{-Me-bpy-St-OH})\text{Cl}]\text{Cl}$  (**1**) and (b)  $[\text{RuCym}(4\text{-Me-bpy-St-OH})\text{Cl}]\text{Cl}$  (**3**) in the presence of 10 equiv. MIM followed in time. Inserted figure shows the charge-transfer region (350 – 500 nm) of the complexes. (c) Absorbance values at 380 nm as a function of time for (**1**).  $\{c_{\text{complex}} = 35 \mu\text{M}; c_{\text{MIM}} = 350 \mu\text{M}; \text{pH} = 7.40 \text{ (PBS' buffer)}; \ell = 1 \text{ cm}; T = 25.0 \text{ }^\circ\text{C}\}$

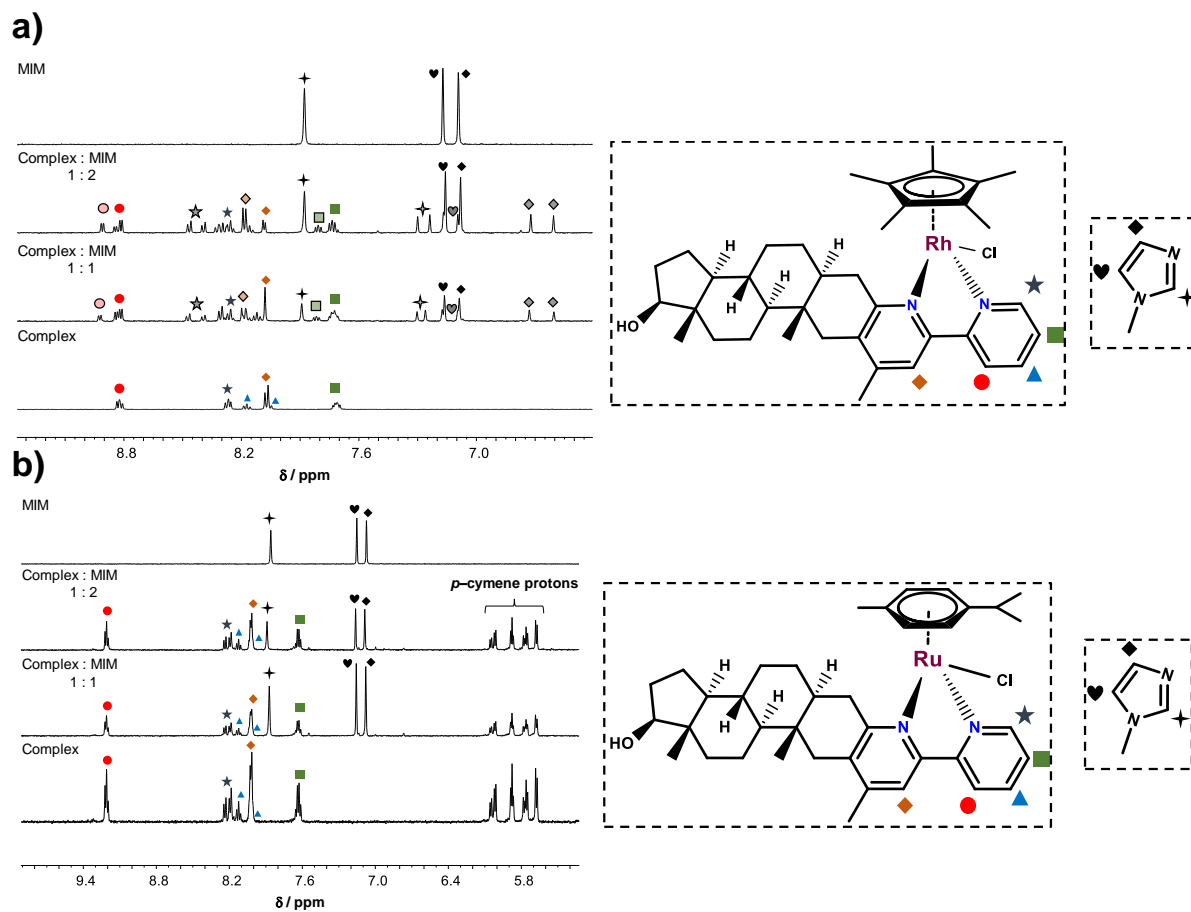

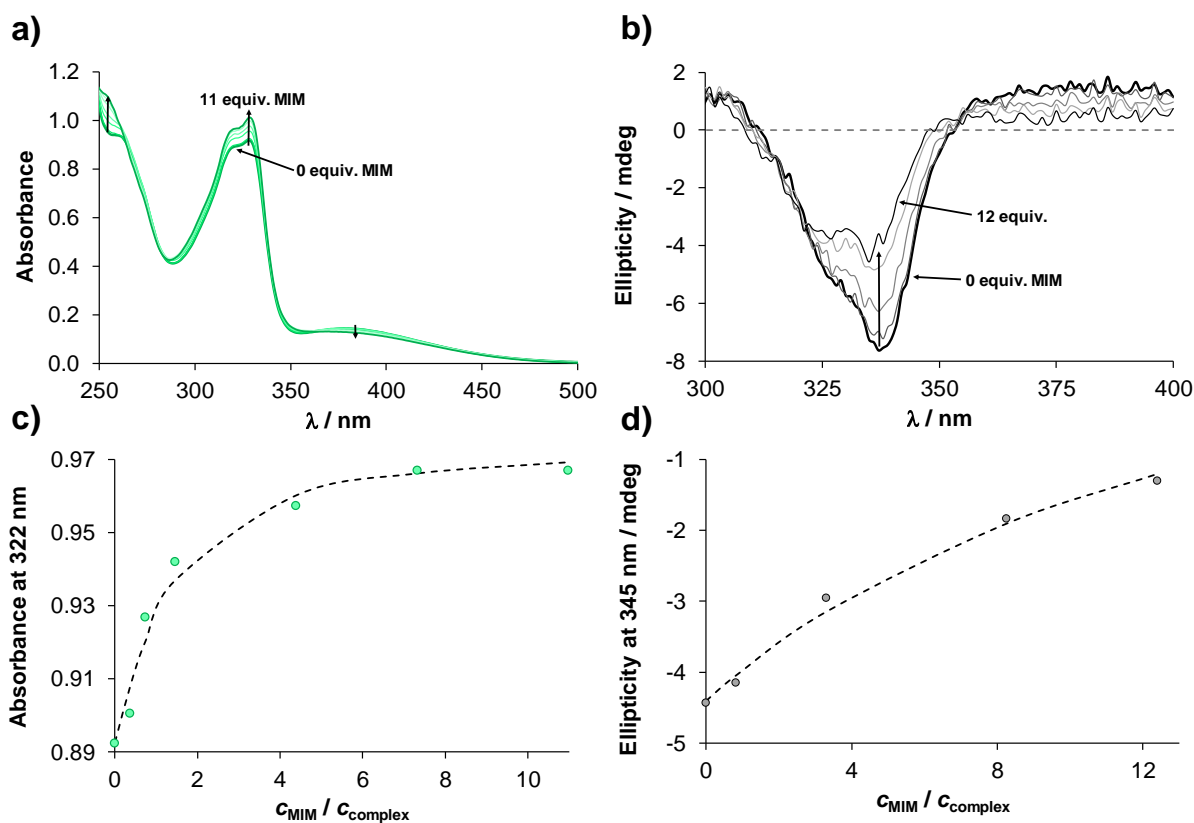

**Figure S40.** (a) UV-vis spectra of  $[\text{RhCp}^*(4\text{-Me-bpy-St-OH})\text{Cl}]\text{Cl}$  (**1**) and (b) CD spectra of  $[\text{RhCp}^*(4\text{-Ph-bpy-St-OH})\text{Cl}]\text{Cl}$  (**2**) complex in the presence of various equivalents of MIM. (c) Absorbance values at 322 nm and (d) ellipticity values at 345 nm as a function of  $c_{\text{MIM}} / c_{\text{complex}}$  ratio along with the fitted (dashed) lines for the same (**1**) and (**2**) complexes, respectively.  $\{c_{\text{complex}} = 63 \text{ or } 71 \mu\text{M}; c_{\text{MIM}} = 0 - 781 \mu\text{M}; \text{pH} = 7.40 \text{ (PBS' buffer)}; \ell = 1 \text{ cm (UV-vis) or } 0.5 \text{ cm (CD)}; T = 25.0 \text{ }^\circ\text{C}\}$

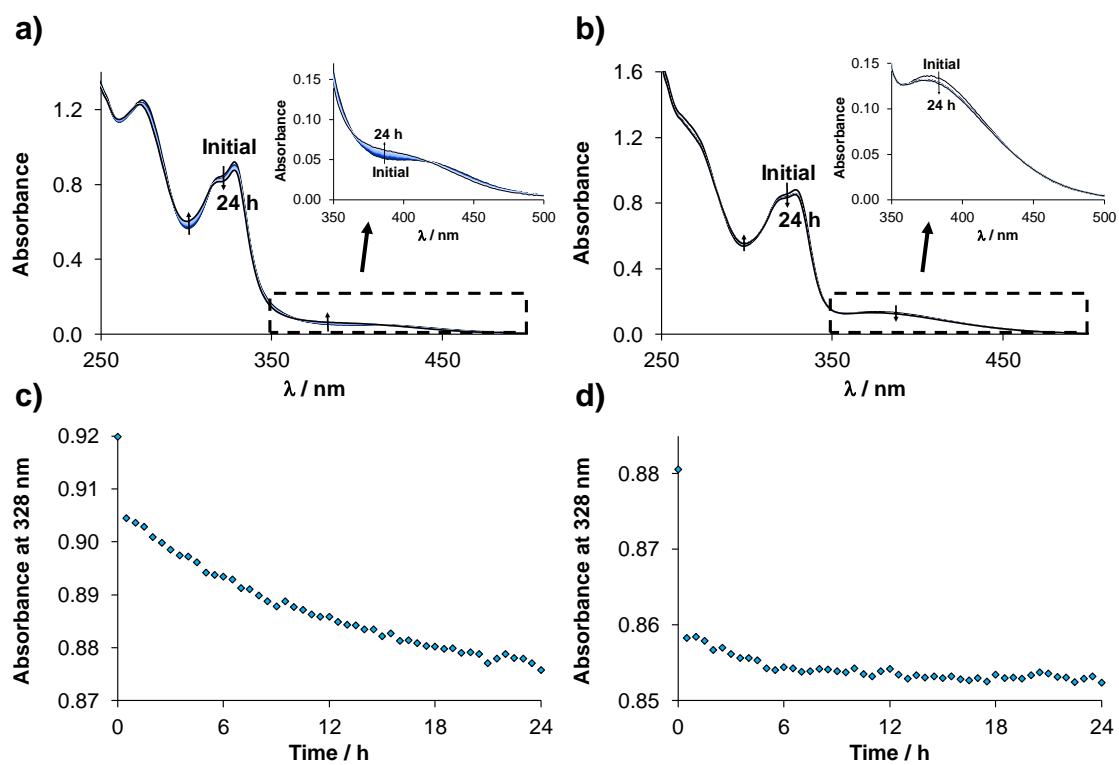

**Figure S41.** UV-vis spectra of (a) [RuCym(4-Me-bpy-St-OH)Cl]Cl (**3**) and (b) [RhCp\*(4-Me-bpy-St-OH)Cl]Cl (**1**) complex in the presence of one equiv. guanine followed in time. Inset shows the charge-transfer region (350 – 500 nm) of the complexes. Absorbance values at 328 nm as a function of time for the same (c) (**3**) and (d) (**1**) complexes. { $c_{\text{complex}} = 70 \mu\text{M}$ ;  $c_{\text{HSA}} = 70 \mu\text{M}$ ; pH = 7.40 (20 mM phosphate buffer with 4 mM KCl);  $\ell = 1 \text{ cm}$ ;  $T = 25.0 \text{ }^\circ\text{C}$ }

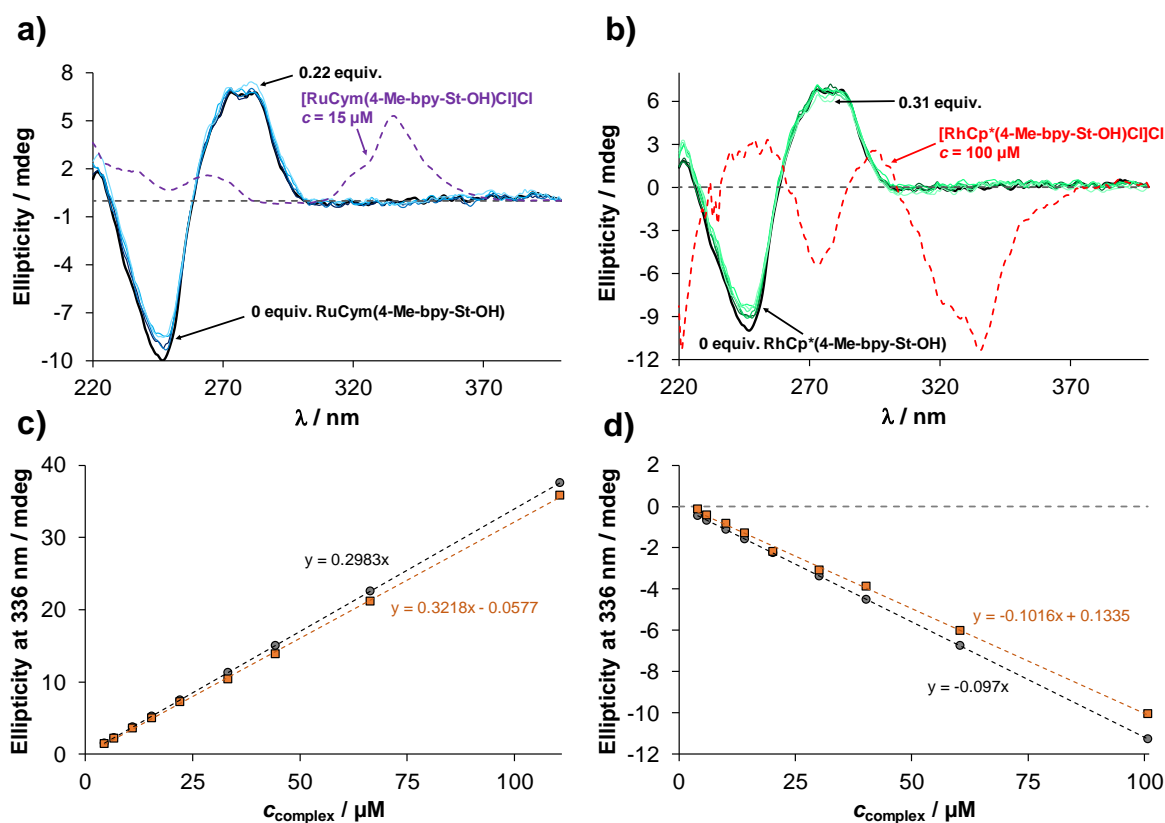

**Figure S42.** CD spectra of ct-DNA in the presence of various amounts of (a) [RuCym(4-Me-bpy-St-OH)Cl]Cl (**3**) and (b) [RhCp\*(4-Me-bpy-St-OH)Cl]Cl (**1**) complex. The CD spectra of the individual complexes are also indicated (dashed lines). Ellipticity values at 336 nm as a function of  $c_{\text{complex}}$  for the same (c) (**3**) and (d) (**1**) complexes in the absence (●) and presence (■) of ct-DNA.  $\{c_{\text{ct-DNA}} = 98 \mu\text{M}; c_{\text{complex}} = 0 - 100 \mu\text{M}; \text{pH} = 7.40$  (20 mM phosphate buffer with 4 mM KCl);  $\ell = 1$  cm;  $T = 25.0 \text{ }^\circ\text{C}\}$  Note: The CD spectra of ct-DNA were corrected with the spectra of the complexes at each point.

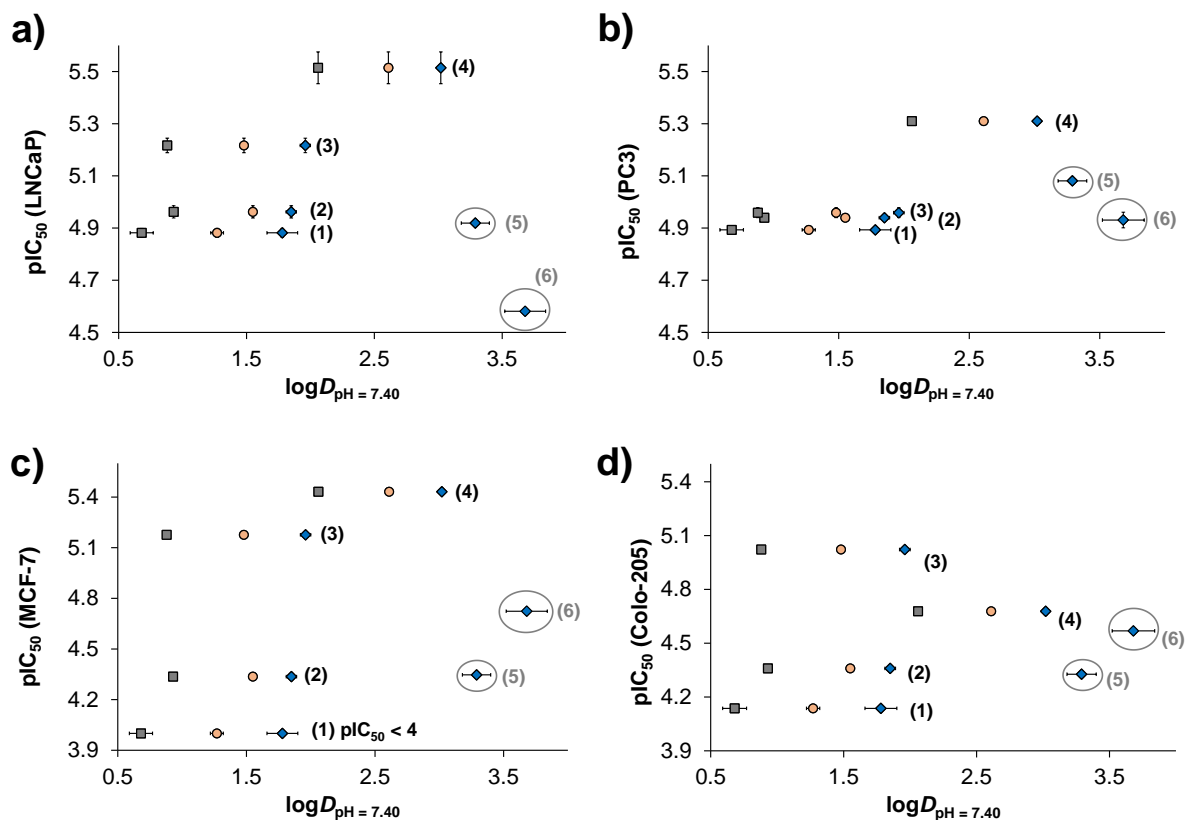

**Figure S43.** Correlation between the *in vitro* cytotoxicity data (as  $pIC_{50} = -\log IC_{50}$ ; where  $IC_{50}$  is expressed in  $\text{mol}/\text{dm}^3$ ) and the distribution coefficients measured at pH 7.40 (as  $\log D_{\text{pH}=7.40}$ ) of the organometallic complexes at the different chloride ion concentrations (4 mM: ■, 24 mM: ●, 100 mM: ◆) in (a) LNCaP, (b) PC3 (c) MCF-7 and (d) Colo-205 human cancer cell lines (incubation time: 72 h).
